# Supplementary material for: Early whole-body mutant huntingtin lowering preserves proteins and lipids important for synapse function and white matter maintenance in the LacQ140 mouse model
Source: PubMed Central journal article supplement (PMC9900921; doi:10.1101/2023.01.26.525697), 2023-01-27
Supplement: media-1.pdf [file media-1.pdf]

### **List of Supplemental Tables**

**Supplementary Table 1.** Summary of changes in mHTT levels for different durations of lowering using LacQ140 mice

**Supplementary Table 2.** Proteins altered by *mHtt* lowering for different periods using LacQ140 mice

**Supplementary Table 3.** Individual lipid species significantly different between any treatment group in 6-month-old mice ( $p < 0.05$ )

**Supplementary Table 4.** Individual lipid species significantly different between 9-month-old LacQ140 and WT mice.

**Supplementary Table 5.** Individual lipid species significantly different between 12-month-old LacQ140 and WT mice.

**Supplementary Table 6.** Differentially expressed striatal transcripts related to sphingolipid metabolism, PI/PIP metabolism, glycerolipid metabolism, and myelin or oligodendrocytes in 6-month-old LacQ140 mice

**Supplementary Table 7.** Differentially expressed striatal transcripts related to sphingolipid metabolism, PI/PIP metabolism, glycerolipid metabolism, and myelin or oligodendrocytes in 12-month-old LacQ140 mice.

### **List of Supplemental Figures**

**Supplementary Figure 1.** Analysis of mHTT levels in crude homogenates of 6, 9 and 12 months old LacQ140 mice.

**Supplementary Figure 2.** Effects of *mHtt* lowering on the subcellular distribution of WT and mHTT by density gradient ultracentrifugation.

**Supplementary Figure 3.** HTT protein levels in P1 fractions.

**Supplementary Figure 4.** Duration of *mHtt* lowering in 6, 9 and 12 months old LacQ140 mice affects levels of GFAP, DARPP32 and ATP5A.

**Supplementary Figure 5.** Glycerophospholipid subclasses detected in striatum of 6-month-old LacQ140 mice.

**Supplementary Figure 6.** Glycerolipid, sphingolipid, sterol lipid, fatty acyl subclasses detected in striatum of 6-month-old LacQ140 mice.

**Supplementary Figure 7.** Glycerophospholipid subclasses detected in striatum of 9-month-old LacQ140 mice.

**Supplementary Figure 8.** Glycerolipid, sphingolipid, and sterol lipid subclasses detected in striatum of 9-month-old LacQ140 mice.

**Supplementary Figure 9.** Glycerophospholipid subclasses detected in striatum of 12-month-old LacQ140 mice.

**Supplementary Figure 10.** Glycerolipid, sphingolipid, sterol lipid, fatty acyl, and prenol lipid subclasses detected in striatum of 12-month-old LacQ140 mice.

**Supplementary Figure 11.** Individual lipid species significantly different between 6-month-old LacQ140 and WT mice ( $p < 0.05$ )

**Supplementary Figure 12.** Individual lipid species significantly different between 9-month-old LacQ140 and WT mice ( $q < 0.05$ )

**Supplementary Figure 13.** Glycerophospholipid and glycerolipid individual lipid species significantly different between 12-month-old LacQ140 and WT mice ( $q < 0.05$ ).

**Supplementary Figure 14.** Sphingolipid individual lipid species significantly different between 12-month-old LacQ140 and WT mice ( $q < 0.05$ )

**Supplementary Figure 15.** Differentially expressed striatal transcripts related to sphingolipid metabolism, PI/PIP metabolism, glycerolipid metabolism, and myelin or oligodendrocytes in 6- and 12-month-old LacQ140 mice

**Supplementary Table 1. Summary of changes in mHTT levels for different durations of mHtt lowering using LacQ140 mice**

|         |                     |              |          | 6 month striatum      |         |                        |         | 9 month striatum      |         |                        |         |
|---------|---------------------|--------------|----------|-----------------------|---------|------------------------|---------|-----------------------|---------|------------------------|---------|
|         |                     |              |          | LacQ140_A vs. LacQ140 |         | LacQ140_2M vs. LacQ140 |         | LacQ140_A vs. LacQ140 |         | LacQ140_2M vs. LacQ140 |         |
|         | HTT epitope         |              |          | % lower               | P value | % lower                | P value | % lower               | P value | % lower                | P value |
| Ab1     | aa1-17              | Wes          | Q7 HTT   |                       | N.S.    |                        | N.S.    |                       | N.S.    |                        | N.S.    |
|         |                     |              | Q140 HTT | 43%                   | <0.01   | 38%                    | <0.01   | 52%                   | <0.01   | 42%                    | <0.01   |
| MW1     | polyQ               | Wes          | Q140 HTT | 47%                   | <0.01   | 40%                    | <0.01   | 43%                   | <0.001  | 44%                    | <0.001  |
| EPR5526 | N-terminal HTT      | Western blot | Q7 HTT   |                       | N.S.    |                        | N.S.    |                       | N.S.    |                        | N.S.    |
|         |                     |              | Q140 HTT |                       | N.S.    |                        | N.S.    | 30%                   | <0.01   | 24%                    | <0.05   |
| PHP3    | Proline rich domain | Western blot | Q140 HTT | 35%                   | <0.01   | 42%                    | <0.001  | 49%                   | <0.001  | 46%                    | <0.001  |

| 12 month striatum |                     |              |          |                           |                  |                          |                          |                |                   |                   |
|-------------------|---------------------|--------------|----------|---------------------------|------------------|--------------------------|--------------------------|----------------|-------------------|-------------------|
|                   |                     |              |          | Group comparison, p value |                  |                          |                          |                |                   |                   |
|                   | HTT epitope         |              |          | LacQ140_A vs. LacQ140     | LacQ140_A vs. WT | LacQ140_A vs. LacQ140_2M | LacQ140_A vs. LacQ140_8M | LacQ140 vs. WT | LacQ140_2M vs. WT | LacQ140_8M vs. WT |
| Ab1               | aa1-17              | Wes          | Q7 HTT   | N.S.                      | <0.001           | <0.05                    | <0.05                    | <0.001         | <0.01             | <0.01             |
|                   |                     |              | Q140 HTT | <0.01                     | -                | N.S.                     | N.S.                     | -              | -                 | -                 |
| MW1               | polyQ               | Wes          | Q140 HTT | N.S.                      | -                | N.S.                     | N.S.                     | -              | -                 | -                 |
| EPR5526           | N-terminal HTT      | Western blot | Q7 HTT   | N.S.                      | N.S.             | N.S.                     | N.S.                     | <0.01          | <0.01             | N.S.              |
|                   |                     |              | Q140 HTT | N.S.                      | -                | N.S.                     | N.S.                     | -              | -                 | -                 |
| PHP3              | Proline rich domain | Western blot | Q140 HTT | N.S.                      | -                | N.S.                     | N.S.                     | -              | -                 | -                 |



**Supplementary Table 3. Individual lipid species significantly different between any treatment group in 6-month-old mice ( $p < 0.05$ )**

| Category             | Subclass | Lipid Species              | m/z         | Formula           | ANOVA                        | Adjusted p-value (q)<br>n = 800 |
|----------------------|----------|----------------------------|-------------|-------------------|------------------------------|---------------------------------|
| Glycerophospholipids | PC       | PC(19:1_16:0)+H            | 774.6007335 | C43 H85 O8 N1 P1  | F (3, 20) = 4.352, *P=0.0163 | 1                               |
|                      | PE       | PE(18:1p_20:4)+H           | 750.5432185 | C43 H77 O7 N1 P1  | F (3, 20) = 3.300, *P=0.0414 | 1                               |
|                      | PE       | PE(18:0p_18:1)+H           | 730.5745185 | C41 H81 O7 N1 P1  | F (3, 20) = 3.108, *P=0.0496 | 1                               |
|                      | PS       | PS(22:6_22:6)-H            | 878.4977605 | C50 H73 O10 N1 P1 | F (3, 20) = 3.498, *P=0.0346 | 1                               |
|                      | PS       | PS(18:0_20:4)-H            | 810.5290605 | C44 H77 O10 N1 P1 | F (3, 20) = 3.349, *P=0.0396 | 1                               |
|                      | PS       | PS(18:0_18:1)+H            | 790.5592635 | C42 H81 O10 N1 P1 | F (3, 20) = 3.297, *P=0.0416 | 1                               |
|                      | PI       | PI(18:0_20:4)+NH4          | 904.5909585 | C47 H87 O13 N1 P1 | F (3, 20) = 3.812, *P=0.0260 | 1                               |
|                      | PI       | PI(16:0_22:6)-H            | 881.5185565 | C47 H78 O13 N0 P1 | F (3, 20) = 3.466, *P=0.0356 | 1                               |
|                      | CL       | CL(22:6_18:1_18:1_22:6)-2H | 773.494489  | C89 H144 O17 P2   | F (3, 20) = 4.096, *P=0.0203 | 1                               |

**Supplementary Table 4. Individual lipid species significantly different between 9-month-old LacQ140 and WT mice ( $q < 0.05$ ).**

| Category             | Subclass      | Lipid Species             | m/z                  | Formula           | ANOVA                          | Adjusted p-value (q)<br>n = 632 |
|----------------------|---------------|---------------------------|----------------------|-------------------|--------------------------------|---------------------------------|
| Glycerophospholipids | PC            | PC(36:5e)+H               | 766.5745185          | C44 H81 O7 N1 P1  | F (3, 20) = 10.68, ***P=0.0002 | 0.02039117                      |
|                      | PE            | PE(16:1e_20:4)-H          | 722.5130155          | C41 H73 O7 N1 P1  | F (3, 20) = 18.14, ***P<0.0001 | 0.00329333                      |
|                      | PE            | PE(16:0p_20:4)+H          | 724.5275685          | C41 H75 O7 N1 P1  | F (3, 20) = 16.97, ***P<0.0001 | 0.00329333                      |
|                      | PI            | PI(16:0_20:4)-H           | 857.5185565          | C45 H78 O13 N0 P1 | F (3, 20) = 8.449, ***P=0.0008 | 0.03984625                      |
|                      | PI            | PI(18:1_20:4)+NH4         | 902.5753085          | C47 H85 O13 N1 P1 | F (3, 20) = 8.086, **P=0.0010  | 0.04159114                      |
|                      | PS            | PS(18:0_20:4)-H           | 810.5290605          | C44 H77 O10 N1 P1 | F (3, 20) = 9.739, ***P=0.0004 | 0.02386757                      |
|                      | PS            | PS(18:0_18:1)-H           | 788.5447105          | C42 H79 O10 N1 P1 | F (3, 20) = 8.226, ***P=0.0009 | 0.04159114                      |
|                      | PS            | PS(18:1_22:6)-H           | 832.5134105          | C46 H75 O10 N1 P1 | F (3, 20) = 7.916, **P=0.0011  | 0.04285691                      |
|                      | Glycerolipids | MGDG                      | MGDG(16:0_18:1)+HCOO | 801.5733535       | C44 H81 O12                    | F (3, 20) = 11.28, ***P=0.0002  |
| TG                   |               | TG(8:2COOH_18:1_18:1)+H   | 773.5925965          | C47 H81 O8        | F (3, 20) = 11.98, ***P=0.0001 | 0.01785822                      |
| Sphingolipids        | Hex1Cer       | Hex1Cer(d18:1_18:0)+H     | 728.6034955          | C42 H82 O8 N1     | F (3, 20) = 10.37, ***P=0.0002 | 0.02039117                      |
|                      | Hex1Cer       | Hex1Cer(t18:0_18:0)+H-H2O | 728.6034955          | C42 H82 O8 N1     | F (3, 20) = 10.35, ***P=0.0003 | 0.02039117                      |
|                      | Hex1Cer       | Hex1Cer(d18:1_25:1)+HCOO  | 868.6883225          | C50 H94 O10 N1    | F (3, 20) = 8.440, ***P=0.0008 | 0.03984625                      |
|                      | SM            | SM(d40:2)+H               | 785.6531025          | C45 H90 O6 N2 P1  | F (3, 20) = 8.052, **P=0.0010  | 0.04159114                      |

**Supplementary Table 5. Individual lipid species significantly different between 12-month-old LacQ140 and WT mice (q<0.05).**

| Category                    | Subclass             | Lipid Species             | m/z                     | Formula           | ANOVA                           | Adjusted p-value (q)<br>n = 735 |
|-----------------------------|----------------------|---------------------------|-------------------------|-------------------|---------------------------------|---------------------------------|
| <b>Glycerophospholipids</b> | <b>PC</b>            | PC(30:0)+H                | 706.5381335             | C38 H77 O8 N1 P1  | F (4, 25) = 7.601, ***P=0.0004  | 0.013150896                     |
|                             | <b>PC</b>            | PC(20:3e_18:0)+H          | 798.6371185             | C46 H89 O7 N1 P1  | F (4, 25) = 5.567, **P=0.0024   | 0.032737797                     |
|                             | <b>PE</b>            | PE(20:1_18:1)+H           | 772.5850835             | C43 H83 O8 N1 P1  | F (4, 25) = 10.36, ****P<0.0001 | 0.003802444                     |
|                             | <b>PE</b>            | PE(16:0p_20:4)+H          | 724.5275685             | C41 H75 O7 N1 P1  | F (4, 25) = 7.879, ***P=0.0003  | 0.011411398                     |
|                             | <b>PA</b>            | PA(36:3e)-H               | 683.5021165             | C39 H72 O7 N0 P1  | F (4, 25) = 13.27, ****P<0.0001 | 0.000660339                     |
|                             | <b>PA</b>            | PA(36:2e)-H               | 685.5177665             | C39 H74 O7 N0 P1  | F (4, 25) = 5.630, **P=0.0023   | 0.032737797                     |
| <b>Glycerolipids</b>        | <b>TG</b>            | TG(16:0_18:1_18:2)+NH4    | 874.7858155             | C55 H104 O6 N1    | F (4, 25) = 8.357, ***P=0.0002  | 0.009358219                     |
|                             | <b>TG</b>            | TG(16:0_16:0_18:1)+NH4    | 850.7858155             | C53 H104 O6 N1    | F (4, 25) = 7.833, ***P=0.0003  | 0.011411398                     |
|                             | <b>TG</b>            | TG(18:1_18:1_18:2)+NH4    | 900.8014655             | C57 H106 O6 N1    | F (4, 25) = 7.113, ***P=0.0006  | 0.01823037                      |
|                             | <b>TG</b>            | TG(18:0_16:0_18:1)+NH4    | 878.8171155             | C55 H108 O6 N1    | F (4, 25) = 6.726, ***P=0.0008  | 0.021749548                     |
|                             | <b>TG</b>            | TG(18:1_18:2_18:2)+NH4    | 898.7858155             | C57 H104 O6 N1    | F (4, 25) = 6.249, **P=0.0013   | 0.027242438                     |
|                             | <b>TG</b>            | TG(56:3+8O)+NH4           | 1058.807735             | C59 H112 O14 N1   | F (4, 25) = 6.109, **P=0.0014   | 0.027242438                     |
|                             | <b>TG</b>            | TG(19:1_18:1_18:1)+NH4    | 916.8327655             | C58 H110 O6 N1    | F (4, 25) = 6.060, **P=0.0015   | 0.027242438                     |
|                             | <b>TG</b>            | TG(16:0_16:1_18:1)+NH4    | 848.7701655             | C53 H102 O6 N1    | F (4, 25) = 5.794, **P=0.0019   | 0.030614623                     |
|                             | <b>TG</b>            | TG(18:2_18:2_18:2)+NH4    | 896.7701655             | C57 H102 O6 N1    | F (4, 25) = 5.352, **P=0.0030   | 0.034548567                     |
|                             | <b>TG</b>            | TG(16:1_18:1_18:2)+NH4    | 872.7701655             | C55 H102 O6 N1    | F (4, 25) = 4.983, **P=0.0043   | 0.043766147                     |
|                             | <b>Sphingolipids</b> | <b>Hex1Cer</b>            | Hex1Cer(d18:1_18:0+O)+H | 744.5984105       | C42 H82 O9 N1                   | F (4, 25) = 14.49, ****P<0.0001 |
| <b>Hex1Cer</b>              |                      | Hex1Cer(d40:2)+HCOO       | 826.6413725             | C47 H88 O10 N1    | F (4, 25) = 9.257, ****P<0.0001 | 0.005751743                     |
| <b>Hex1Cer</b>              |                      | Hex1Cer(d41:2)+HCOO       | 840.6570225             | C48 H90 O10 N1    | F (4, 25) = 7.880, ***P=0.0003  | 0.011411398                     |
| <b>Hex1Cer</b>              |                      | Hex1Cer(d18:1_22:1)+H     | 782.6504455             | C46 H88 O8 N1     | F (4, 25) = 6.637, ***P=0.0009  | 0.021916512                     |
| <b>Hex1Cer</b>              |                      | Hex1Cer(t18:0_22:1)+H-H2O | 782.6504455             | C46 H88 O8 N1     | F (4, 25) = 6.181, **P=0.0013   | 0.027242438                     |
| <b>Hex1Cer</b>              |                      | Hex1Cer(d18:2_22:0+O)+H   | 798.6453605             | C46 H88 O9 N1     | F (4, 25) = 5.594, **P=0.0023   | 0.032737797                     |
| <b>SM</b>                   |                      | SM(d41:1)+HCOO            | 845.6753295             | C47 H94 O8 N2 P1  | F (4, 25) = 6.980, ***P=0.0006  | 0.019670123                     |
| <b>SM</b>                   |                      | SM(d18:1_23:0)+H          | 801.6844025             | C46 H94 O6 N2 P1  | F (4, 25) = 5.007, **P=0.0042   | 0.043766147                     |
| <b>CerP</b>                 |                      | CerP(t40:3)+CH3COO        | 772.5497955             | C42 H79 O9 N1 P1  | F (4, 25) = 14.26, ****P<0.0001 | 0.000478321                     |
| <b>ST</b>                   |                      | ST(d18:1_22:1)+H          | 862.6072625             | C46 H88 O11 N1 S1 | F (4, 25) = 6.263, **P=0.0012   | 0.027242438                     |

**Supplementary Table 6. Differentially expressed striatal transcripts related to sphingolipid metabolism, PI/PIP metabolism, glycerolipid metabolism, and myelin or oligodendrocytes in 6-month-old LacQ140 mice**

| Category                              | Gene                                          | Description                                                                      | Fold Change     | FDR adj. p value |
|---------------------------------------|-----------------------------------------------|----------------------------------------------------------------------------------|-----------------|------------------|
| <b>PI/PIP metabolism</b>              | Inpp4b                                        | inositol polyphosphate-4-phosphatase, type II                                    | -1.201960       | 1.01E-02         |
|                                       | Inpp5j                                        | inositol polyphosphate 5-phosphatase J                                           | -1.507014       | 9.86E-16         |
|                                       | Ippk                                          | inositol 1,3,4,5,6-pentakisphosphate 2-kinase                                    | -1.246942       | 4.23E-05         |
|                                       | Pigc                                          | phosphatidylinositol glycan anchor biosynthesis, class C                         | -1.455025       | 1.05E-08         |
|                                       | Pik3c2b                                       | phosphatidylinositol-4-phosphate 3-kinase catalytic subunit type 2 beta          | -1.222034       | 2.01E-02         |
|                                       | Pik3r6                                        | phosphoinositide-3-kinase regulatory subunit 5                                   | -1.326717       | 1.44E-02         |
|                                       | Pla2g4c                                       | phospholipase A2, group IVC (cytosolic, calcium-independent)                     | -3.049612       | 3.39E-02         |
|                                       | Pla2g7                                        | phospholipase A2, group VII (platelet-activating factor acetylhydrolase, plasma) | -1.391677       | 4.64E-09         |
|                                       | Plcd4                                         | phospholipase C, delta 4                                                         | -1.276632       | 3.97E-08         |
|                                       | Plcdx1                                        | phosphatidylinositol-specific phospholipase C, X domain containing 1             | -1.308018       | 1.47E-05         |
|                                       | Pld5                                          | phospholipase D family, member 5                                                 | -1.221793       | 1.90E-03         |
|                                       | Plpp3                                         | phospholipid phosphatase 3                                                       | -1.203758       | 5.52E-07         |
|                                       | Itpkc                                         | inositol 1,4,5-trisphosphate 3-kinase C                                          | 1.208151        | 8.26E-04         |
|                                       | Nyap1                                         | neuronal tyrosine-phosphorylated phosphoinositide 3-kinase adaptor 1             | 1.333238        | 4.15E-07         |
|                                       | Pla2g4e                                       | phospholipase A2, group IVE                                                      | 1.559296        | 1.10E-05         |
|                                       | Plcd3                                         | phospholipase C, delta 3                                                         | 1.304483        | 2.65E-09         |
|                                       | Pld6                                          | phospholipase D family, member 6                                                 | 1.274061        | 2.91E-02         |
|                                       | Plpp1                                         | phospholipid phosphatase 1                                                       | 1.240151        | 2.56E-08         |
|                                       | Plppr2                                        | phospholipid phosphatase related 2                                               | 1.460144        | 8.46E-10         |
|                                       | <b>Sphingolipid metabolism</b>                | Arsg                                                                             | arylsulfatase G | -1.249456        |
| Asah1                                 |                                               | N-acylsphingosine amidohydrolase 1                                               | -1.213189       | 1.48E-04         |
| B4galt4                               |                                               | UDP-Gal:betaGlcNAc beta 1,4-galactosyltransferase, polypeptide 4                 | -1.272453       | 2.73E-10         |
| Elovl1                                |                                               | elongation of very long chain fatty acids (FEN1/Elo2, SUR4/Elo3, yeast)-like 1   | -1.211314       | 1.02E-04         |
| Fa2h                                  |                                               | fatty acid 2-hydroxylase                                                         | -1.349640       | 5.82E-05         |
| Gal3st4                               |                                               | galactose-3-O-sulfotransferase 4                                                 | -1.376902       | 3.48E-03         |
| Gba2                                  |                                               | glucosidase beta 2                                                               | -1.305432       | 2.25E-14         |
| Ggta1                                 |                                               | glycoprotein galactosyltransferase alpha 1, 3                                    | -1.208597       | 1.47E-02         |
| Ormdl2                                |                                               | ORM1-like 2 (S. cerevisiae)                                                      | -1.230967       | 2.63E-02         |
| S1pr1                                 |                                               | sphingosine-1-phosphate receptor 1                                               | -1.284319       | 3.14E-11         |
| Sptssb                                |                                               | serine palmitoyltransferase, small subunit B                                     | -1.569383       | 2.30E-02         |
| St3gal4                               |                                               | ST3 beta-galactoside alpha-2,3-sialyltransferase 4                               | -1.292839       | 2.89E-06         |
| St3gal6                               |                                               | ST3 beta-galactoside alpha-2,3-sialyltransferase 6                               | -1.206594       | 7.02E-03         |
| Ugt8a                                 |                                               | UDP galactosyltransferase 8A                                                     | -1.659289       | 9.82E-09         |
| Gal3st3                               |                                               | galactose-3-O-sulfotransferase 3                                                 | 1.225009        | 2.23E-03         |
| Smpd13b                               | sphingomyelin phosphodiesterase, acid-like 3B | 1.440528                                                                         | 4.01E-06        |                  |
| <b>Glycerolipid metabolism</b>        | Dgat2l6                                       | diacylglycerol O-acyltransferase 2-like 6                                        | -2.873604       | 5.89E-10         |
|                                       | Gpat2                                         | glycerol-3-phosphate acyltransferase 2, mitochondrial                            | -1.419945       | 4.83E-02         |
| <b>Myelin/oligodendrocyte related</b> | Cldn11                                        | claudin 11                                                                       | -1.284516       | 9.74E-08         |
|                                       | Ernm                                          | ermin, ERM-like protein                                                          | -1.356389       | 8.79E-07         |
|                                       | Mal                                           | myelin and lymphocyte protein, T cell differentiation protein                    | -1.497728       | 4.28E-19         |
|                                       | Mbp                                           | myelin basic protein                                                             | -1.210545       | 9.93E-06         |
|                                       | Plp1                                          | proteolipid protein (myelin) 1                                                   | -1.456444       | 2.54E-18         |
|                                       | Pmp22                                         | peripheral myelin protein 22                                                     | -1.266785       | 2.98E-06         |
|                                       | Tcf7l2                                        | transcription factor 7 like 2, T cell specific, HMG box                          | -1.691672       | 1.16E-02         |

**Supplementary Table 7. Differentially expressed striatal transcripts related to sphingolipid metabolism, PI/PIP metabolism, glycerolipid metabolism, and myelin or oligodendrocytes in 12-month-old LacQ140 mice.**

| Category                       | Gene                    | Description                                                             | Fold Change                                              | FDR adj. p value |
|--------------------------------|-------------------------|-------------------------------------------------------------------------|----------------------------------------------------------|------------------|
| PI/PIP metabolism              | Inpp5a                  | inositol polyphosphate-5-phosphatase A                                  | -1.220035106                                             | 7.45E-13         |
|                                | Inpp5j                  | inositol polyphosphate 5-phosphatase J                                  | -1.746903179                                             | 2.29E-47         |
|                                | Inpp1                   | inositol polyphosphate phosphatase-like 1                               | -1.430644212                                             | 8.13E-22         |
|                                | Ippk                    | inositol 1,3,4,5,6-pentakisphosphate 2-kinase                           | -1.463777292                                             | 2.07E-19         |
|                                | Isyna1                  | myo-inositol 1-phosphate synthase A1                                    | -1.251503553                                             | 0.00604556       |
|                                | Itpka                   | inositol 1,4,5-trisphosphate 3-kinase A                                 | -1.423039308                                             | 4.58E-08         |
|                                | Pdpk1                   | 3-phosphoinositide dependent protein kinase 1                           | -1.23245825                                              | 0.000244656      |
|                                | Pigc                    | phosphatidylinositol glycan anchor biosynthesis, class C                | -1.284089248                                             | 4.26E-08         |
|                                | Pik3c2b                 | phosphatidylinositol-4-phosphate 3-kinase catalytic subunit type 2 beta | -1.332729484                                             | 0.0000083        |
|                                | Pitpnc1                 | phosphatidylinositol transfer protein, cytoplasmic 1                    | -1.277072463                                             | 0.00000166       |
|                                | Pitpnm2                 | phosphatidylinositol transfer protein, membrane-associated 2            | -1.6037997                                               | 2.12E-33         |
|                                | Plcb1                   | phospholipase C, beta 1                                                 | -1.378055868                                             | 4.53E-08         |
|                                | Plcb3                   | phospholipase C, beta 3                                                 | -1.208945654                                             | 0.000018         |
|                                | Plce1                   | phospholipase C, epsilon 1                                              | -1.269903756                                             | 0.0000595        |
|                                | Plc1                    | phospholipase C-like 1                                                  | -1.295458515                                             | 0.000208693      |
|                                | Plcx1                   | phosphatidylinositol-specific phospholipase C, X domain containing 1    | -1.49232196                                              | 8.15E-11         |
|                                | Pld5                    | phospholipase D family, member 5                                        | -1.206041129                                             | 0.001149898      |
|                                | Plpp3                   | phospholipid phosphatase 3                                              | -1.203543891                                             | 0.004039833      |
|                                | Plpp6                   | phospholipid phosphatase 6                                              | -1.334745125                                             | 0.0000291        |
|                                | Sphingolipid metabolism | Pigz                                                                    | phosphatidylinositol glycan anchor biosynthesis, class Z | 1.271675102      |
| Plaa                           |                         | phospholipase A2, activating protein                                    | 1.225292039                                              | 0.0000279        |
| Pla2g4a                        |                         | phospholipase A2, group IVA (cytosolic, calcium-dependent)              | 1.374559675                                              | 0.00023383       |
| Pla2g4e                        |                         | phospholipase A2, group IVE                                             | 1.433879681                                              | 0.034925071      |
| Plpp1                          |                         | phospholipid phosphatase 1                                              | 1.32803325                                               | 1.31E-11         |
| Plpp2                          |                         | phospholipid phosphatase 2                                              | 1.479502814                                              | 0.000000017      |
| Plppr2                         |                         | phospholipid phosphatase related 2                                      | 1.387816211                                              | 2.09E-08         |
| B4galt2                        |                         | UDP-Gal:betaGlcNAc beta 1,4- galactosyltransferase, polypeptide 2       | -1.273957781                                             | 0.0000103        |
| Fa2h                           |                         | fatty acid 2-hydroxylase                                                | -1.291974775                                             | 0.001225211      |
| Gba2                           |                         | glucosidase beta 2                                                      | -1.388099803                                             | 1.79E-19         |
| Glycerolipid metabolism        | Ppara                   | peroxisome proliferator activated receptor alpha                        | -1.399564382                                             | 0.028802402      |
|                                | Pparg                   | peroxisome proliferator activated receptor gamma                        | -1.461681387                                             | 0.040114102      |
|                                | S1pr1                   | sphingosine-1-phosphate receptor 1                                      | -1.299983778                                             | 0.00046959       |
|                                | S1pr4                   | sphingosine-1-phosphate receptor 4                                      | -1.768321775                                             | 0.005355694      |
|                                | Sgms1                   | sphingomyelin synthase 1                                                | -1.233983698                                             | 0.00000415       |
|                                | Sgpp2                   | sphingosine-1-phosphate phosphatase 2                                   | -1.254739263                                             | 0.008783654      |
|                                | Smpd3                   | sphingomyelin phosphodiesterase 3, neutral                              | -1.367745501                                             | 4.17E-17         |
|                                | St3gal2                 | ST3 beta-galactoside alpha-2,3-sialyltransferase 2                      | -1.233274708                                             | 0.00000317       |
|                                | St3gal4                 | ST3 beta-galactoside alpha-2,3-sialyltransferase 4                      | -1.219568694                                             | 0.0000195        |
|                                | Ugt8a                   | UDP galactosyltransferase 8A                                            | -1.405539311                                             | 0.017983386      |
|                                | Acer3                   | alkaline ceramidase 3                                                   | 1.208246196                                              | 0.00193467       |
|                                | B4galt6                 | UDP-Gal:betaGlcNAc beta 1,4-galactosyltransferase, polypeptide 6        | 1.215068033                                              | 0.000000425      |
|                                | Cers4                   | ceramide synthase 4                                                     | 1.245598312                                              | 0.000133202      |
|                                | Gdap11                  | ganglioside-induced differentiation-associated protein 1-like 1         | 1.20387408                                               | 0.000106063      |
|                                | Smpd13b                 | sphingomyelin phosphodiesterase, acid-like 3B                           | 1.239420969                                              | 0.0000114        |
| Myelin/oligodendrocyte related | Dagla                   | diacylglycerol lipase, alpha                                            | -1.264855847                                             | 0.0000033        |
|                                | Dgat2                   | diacylglycerol O-acyltransferase 2                                      | -1.255826793                                             | 6.08E-08         |
|                                | Dgat2l6                 | diacylglycerol O-acyltransferase 2-like 6                               | -3.730144224                                             | 9.96E-08         |
|                                | Dgkb                    | diacylglycerol kinase, beta                                             | -1.391179035                                             | 2.82E-08         |
|                                | Dgki                    | diacylglycerol kinase, iota                                             | -1.285596371                                             | 0.006874845      |
|                                | Gpat2                   | glycerol-3-phosphate acyltransferase 2, mitochondrial                   | -2.323339721                                             | 5.75E-09         |
|                                | Lpin3                   | lipin 3                                                                 | -1.264610282                                             | 0.047484156      |
|                                | Dgat1                   | diacylglycerol O-acyltransferase 1                                      | 1.20805369                                               | 0.018755728      |
| Myelin/oligodendrocyte related | Dgka                    | diacylglycerol kinase, alpha                                            | 1.221574582                                              | 0.00868915       |
|                                | Dgkg                    | diacylglycerol kinase, gamma                                            | 1.223769613                                              | 0.023533602      |
|                                | Cldn11                  | claudin 11                                                              | -1.353046766                                             | 2.21E-10         |
|                                | Mobp                    | myelin-associated oligodendrocytic basic protein                        | -1.330822203                                             | 0.000605929      |
|                                | Mpzl3                   | myelin protein zero-like 3                                              | -1.274933751                                             | 0.000133969      |
|                                | Myt1l                   | myelin transcription factor 1-like                                      | -1.342177794                                             | 0.00000605       |
|                                | Plp1                    | proteolipid protein (myelin) 1                                          | -1.377474017                                             | 0.000000137      |
| Myelin/oligodendrocyte related | Olig1                   | oligodendrocyte transcription factor 1                                  | 1.215647167                                              | 0.004493267      |
|                                | Omg                     | oligodendrocyte myelin glycoprotein                                     | 1.218646322                                              | 0.0000128        |
|                                | Opalin                  | oligodendrocytic myelin paranodal and inner loop protein                | 1.515412385                                              | 0.000000898      |

# Supplementary Figure 1

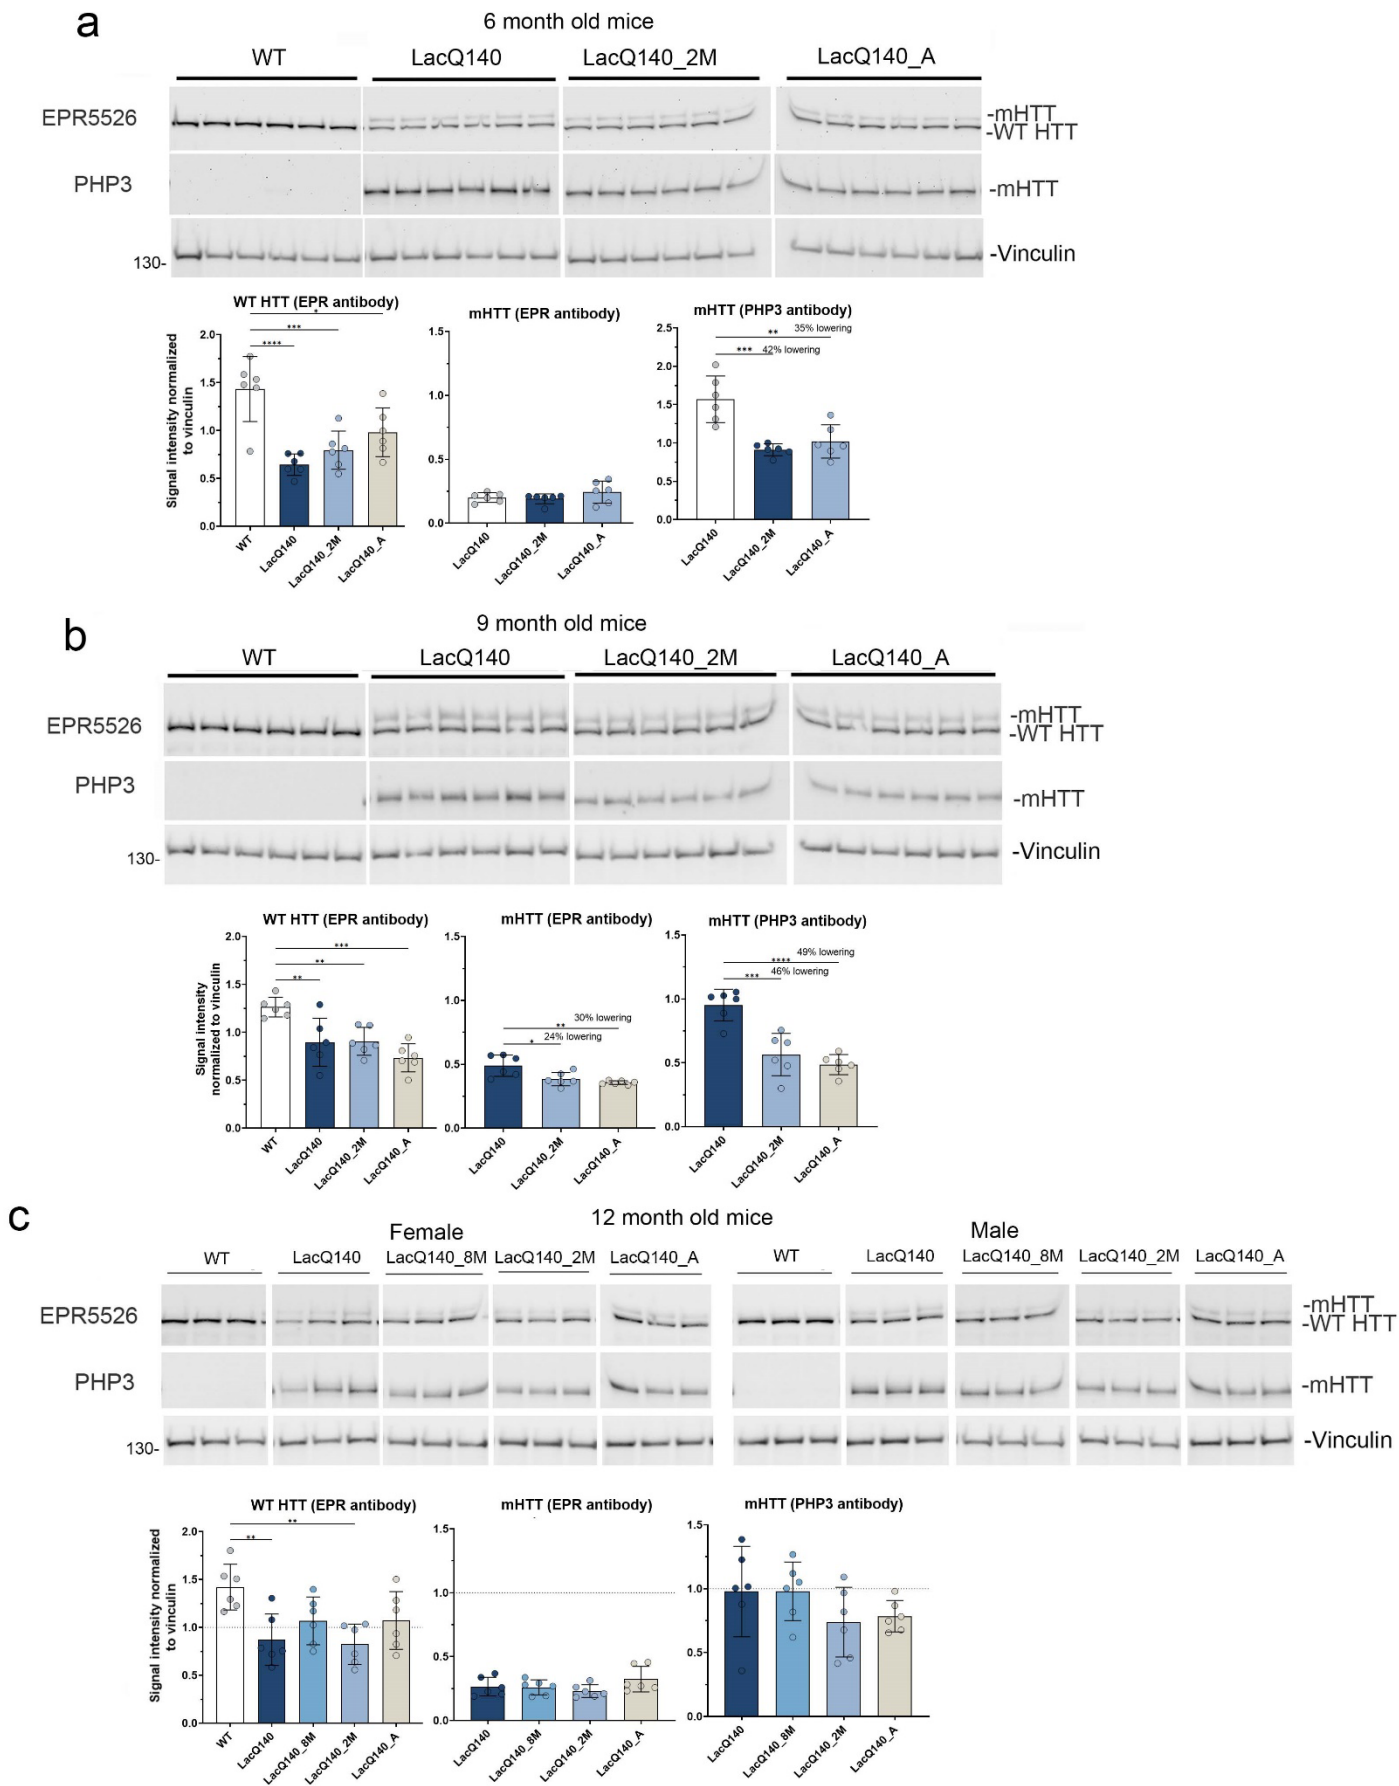



**Supplementary Figure 1. Analysis of mHTT protein levels in crude homogenates of 6, 9 and 12 months old mice.**

HTT levels were analyzed by western blot on equal amounts of protein (10  $\mu$ g) using anti-HTT antibody EPR5526 and anti-polyQ antibody PHP3. Total pixel intensity quantification for each band measured using ImageJ software in 6 month old mice shows a significant decrease in WT HTT as detected with EPR5526 in all LacQ140 mice compared to WT mice but no change in mHTT levels (**a**). mHTT levels are significantly lower in LacQ140\_2M and LacQ140\_A mice as detected with PHP3 compared to LacQ140 (**a**, -42% and -35% respectively, \*\* $p < 0.01$ , \*\*\* $p < 0.001$ , One-way ANOVA with Tukey's multiple comparison test, N=6).

Total pixel intensity quantification in 9 month old mice shows a significant decrease in WT HTT as detected with EPR5526 in all LacQ140 mice compared to WT mice. (**b**). mHTT levels are significantly lower in LacQ140\_2M and LacQ140\_A mice as detected with EPR5526 and PHP3 compared to LacQ140 (**b**, EPR5526: -24% and -30%, respectively; PHP3: -46% and -49% respectively, \* $p < 0.05$ , \*\* $p < 0.01$ , \*\*\* $p < 0.001$ , One-way ANOVA with Tukey's multiple comparison test, N=6).

Total pixel intensity quantification in 12 month old mice shows a significant decrease in WT HTT as detected with EPR5526 in LacQ140 and LacQ140\_2M compared to WT mice. No changes in mHTT levels as detected with either EPR5526 or PHP3 were observed (**c**).

# Supplementary Figure 2

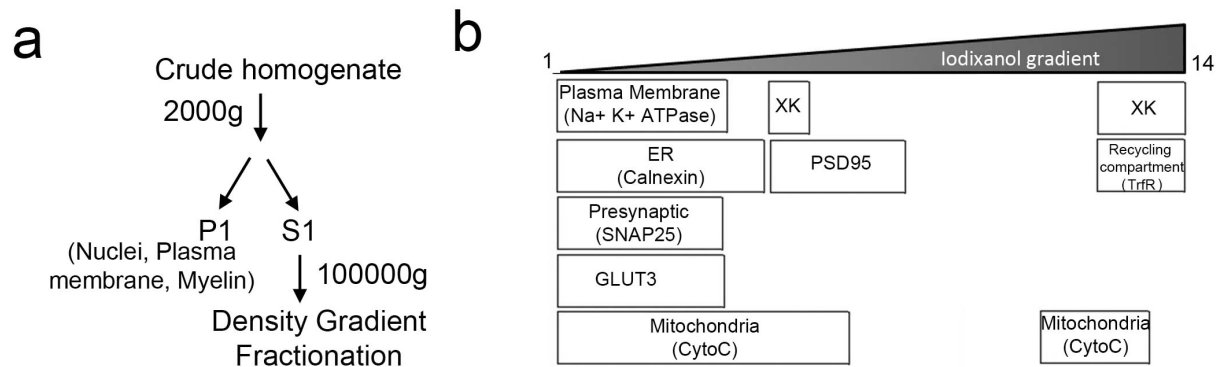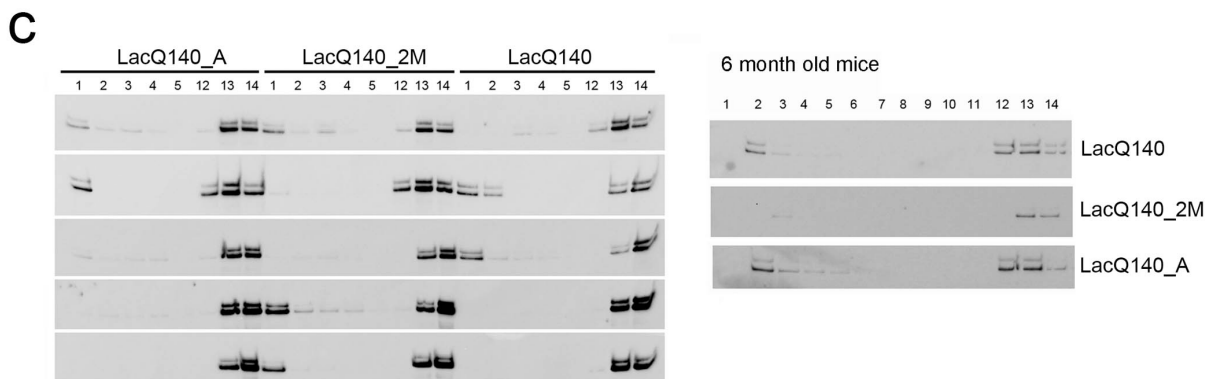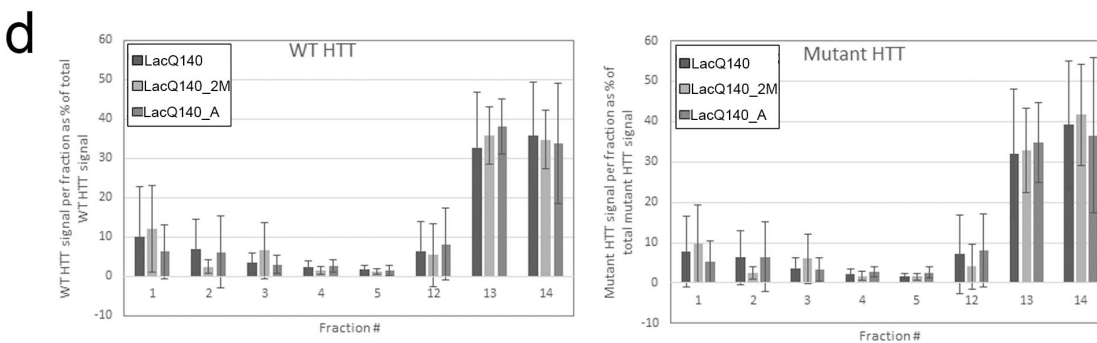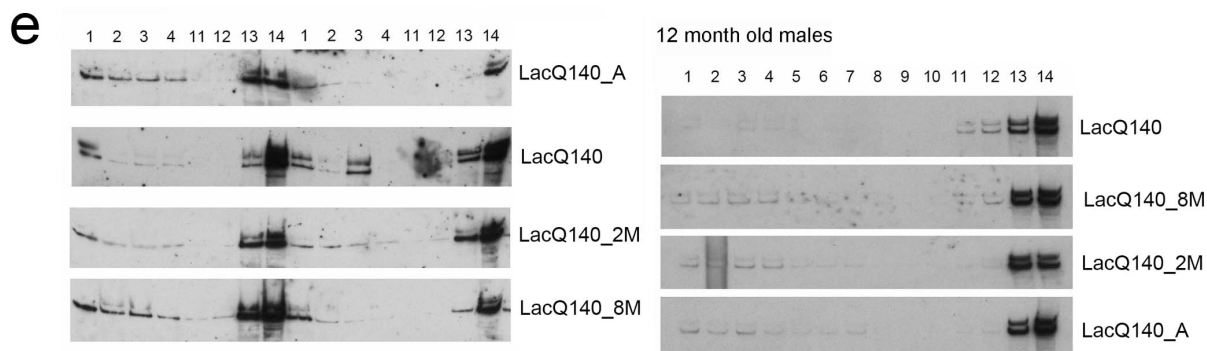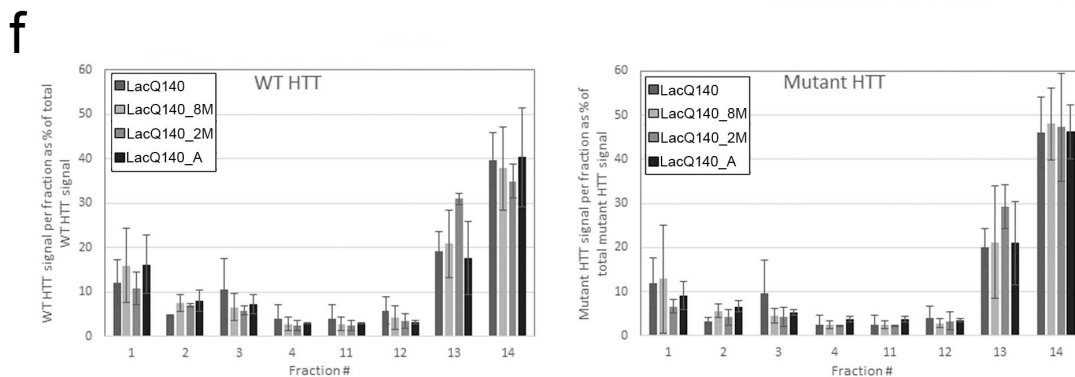

**Supplementary Figure 2. Effects of *mHtt* lowering on the subcellular distribution of WT and mHTT by density gradient ultracentrifugation.**

Diagram depicts the centrifugation strategy for protein samples (a). Schematic shows the approximate location in the fractions of protein markers and the organelles found in these compartments (b). Western blot images for equal volumes of fractions 1-14 (right blots, each strip is from one mouse) or fractions 1-5 and 12-14 (left blots) from 6-month-old mice probed with anti-HTT antibody Ab1 are shown in c. Each strip in left blots is a set of 1 mouse per treatment group with the groups labeled at the top of the blots. Total pixel intensity quantification for each band using ImageJ software is graphed as average percent of total HTT signal for each fraction  $\pm$  SD (d). Representative western blot images for equal volumes of fractions 1-14 (right blots, each strip is from one mouse) or 1-4 and 11-14 (left blots) from 12-month-old mice probed with anti-HTT antibody Ab1 are shown in e. Each strip in the left blots is from 2 mice per group with the groups labeled on the right. Total pixel intensity quantified for each band using ImageJ software are graphed as average percent of total HTT signal for each fraction  $\pm$  SD (f). There is no difference in WT or mHTT levels as a percent of total HTT in any fraction with any treatment of LacQ140 mice at 6 or 12 months (unpaired t test).

# Supplementary Figure 3

a

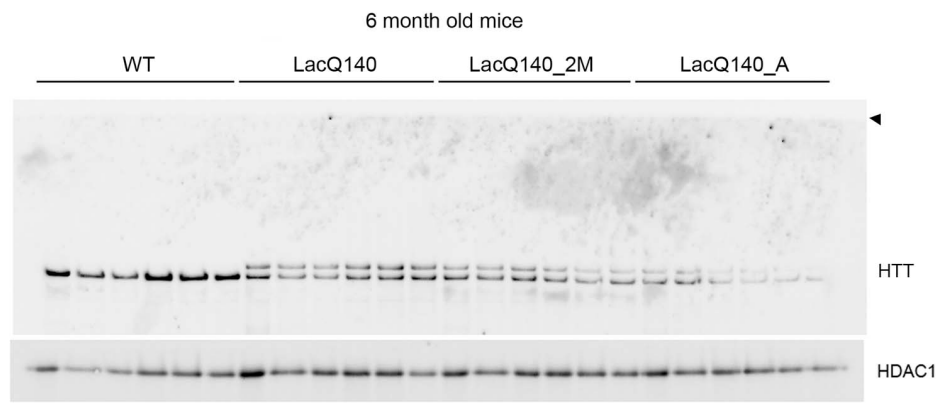

6 months WT HTT (Ab1)

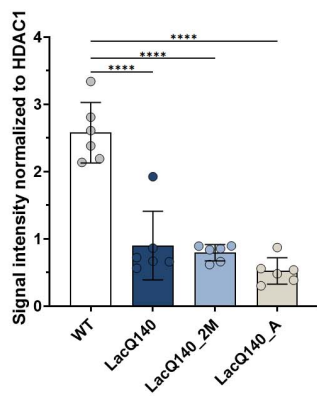

6 months Mutant HTT (Ab1)

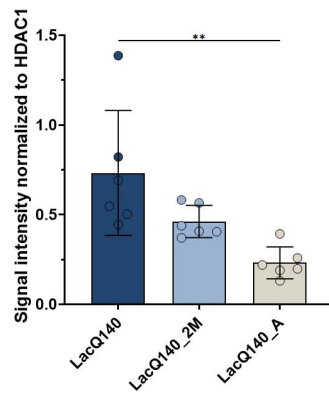

b

12 month old mice

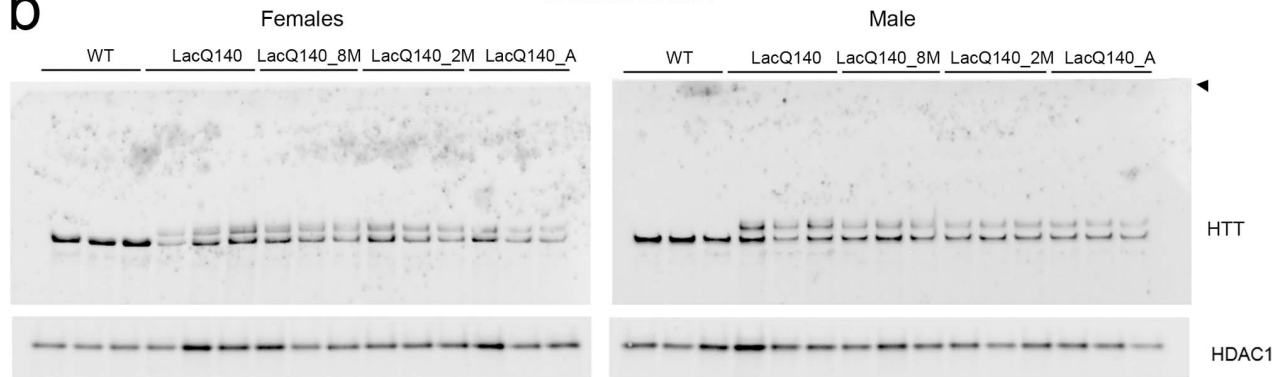

12 months WT HTT (Ab1)

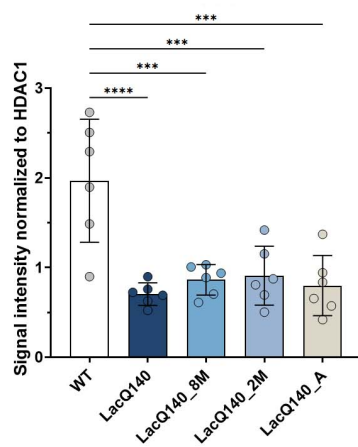

12 months Mutant HTT (Ab1)

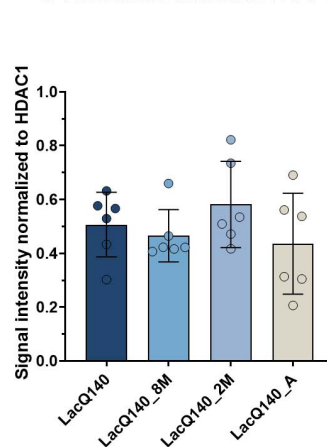

**Supplementary Figure 3. HTT protein levels in P1 fractions.** Equal protein (10  $\mu$ g) from P1 fractions from 6-month-old (a) and 12-month-old (b) LacQ140 and WT mice were analyzed by western blot for HTT levels with anti-HTT Ab1. No aggregated protein was observed at the top of the gel (arrowhead). Total pixel intensity quantification for each band was measured using ImageJ software and normalized to HDAC1 signal. There was a significant decrease in WT HTT signal in all of the treatment conditions for LacQ140 mice compared to WT mice in both 6-month (a) and 12-month-old (b) mice (\*\* $p < 0.001$ , One-way ANOVA with Tukey's multiple comparison test,  $n = 6$ ). There were significantly lower levels of mHTT in the 6-month-old LacQ140\_A mice compared to LacQ140 (a, \*\* $p < 0.01$ , One-way ANOVA with Tukey's multiple comparison test,  $n = 6$ ) but no changes in mHTT levels were detected in the 12 month old LacQ140 mice (b).

# Supplementary Figure 4

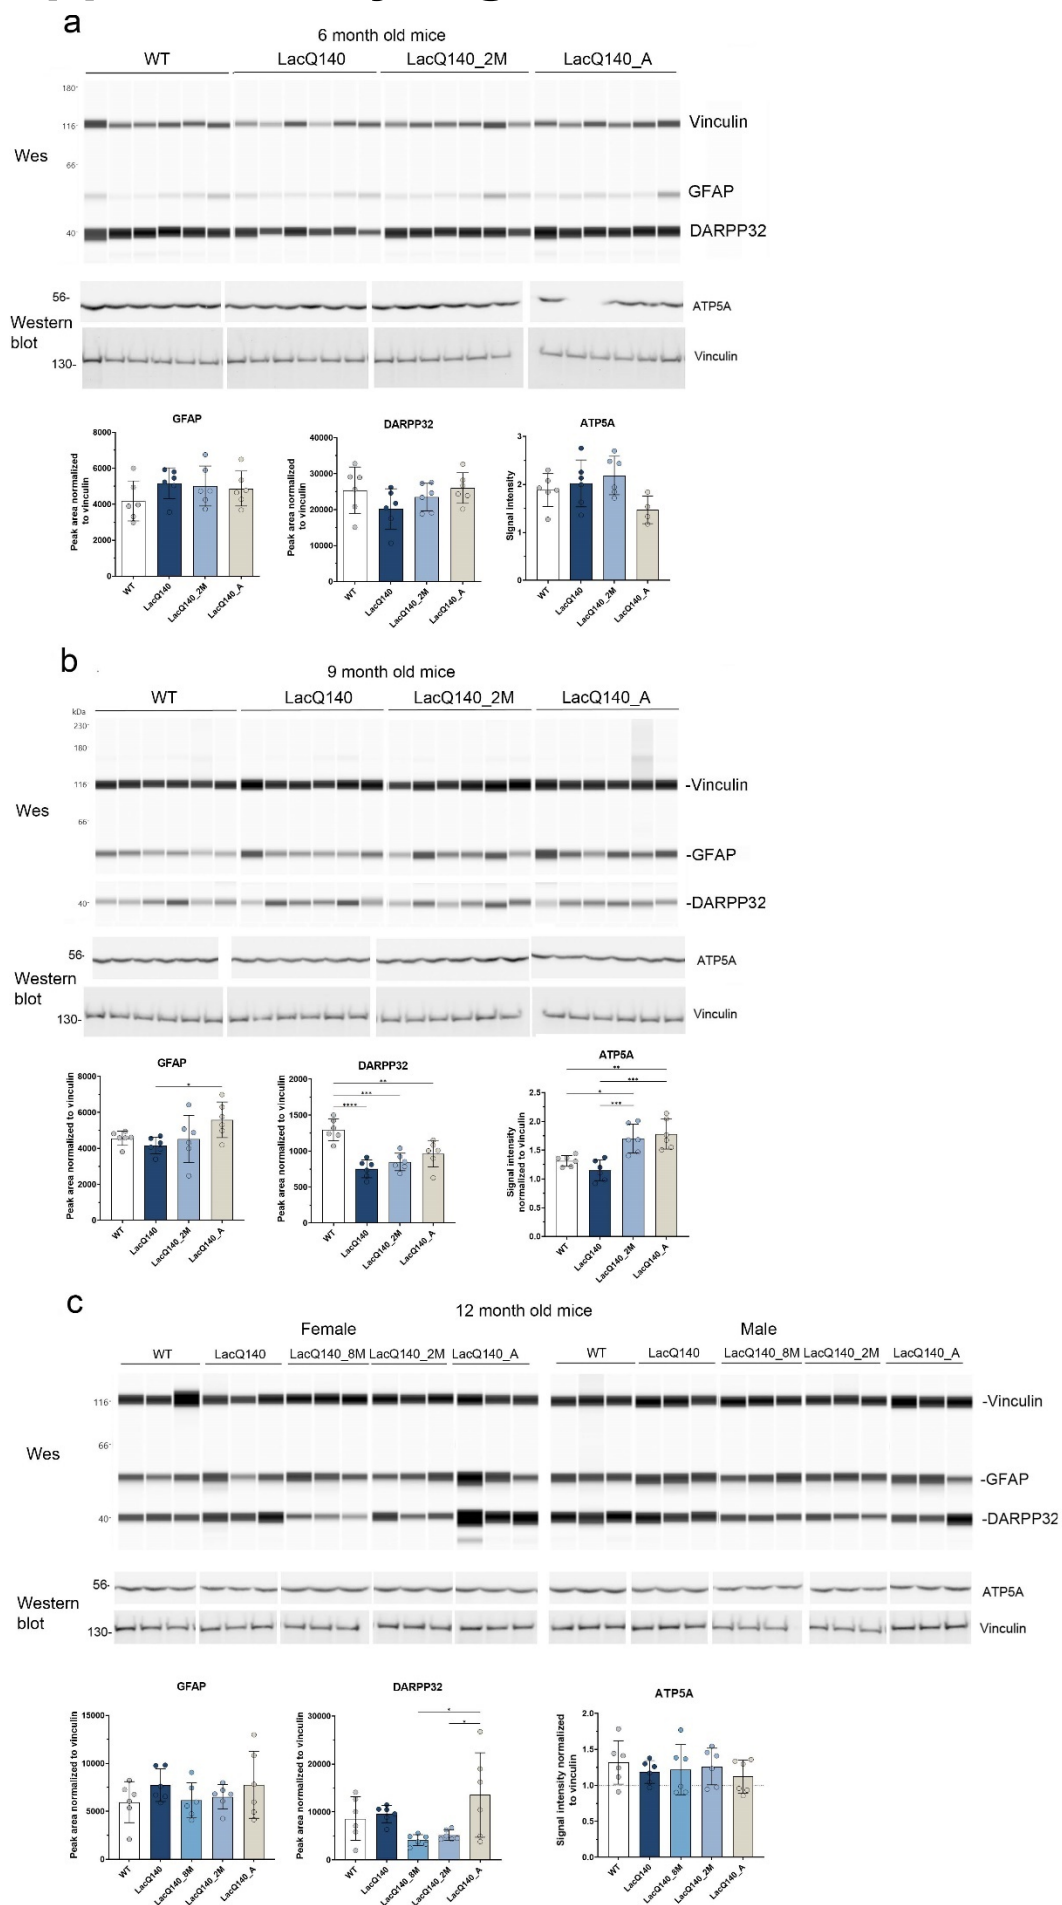

**Supplementary Figure 4. Duration of *mHtt* lowering in 6, 9 and 12 months old LacQ140 mice has minimal effects on levels of GFAP, DARPP32 and ATP5A.**

GFAP and DARPP32 levels were analyzed by capillary immunoassay on equal amounts of protein (0.6 mg) and ATP5A levels were analyzed by western blot on equal amounts of protein (10 mg). In 6-month-old mice, peak area analysis shows no significant change in GFAP or DARPP32 levels (**a**) and total pixel intensity quantification shows no changes in ATP5A levels in any of the LacQ140 or WT mice (**a**).

Peak area analysis in 9 month old mice shows a significant increase in GFAP levels in LacQ140\_A compared to WT mice. There was a significant decrease in DARPP32 levels in all LacQ140 mice compared to WT (**b**, \*\* $p < 0.05$ , \*\* $p < 0.01$ , \*\*\* $p < 0.001$ , One-way ANOVA with Tukey's multiple comparison test,  $n=6$ ). Total pixel intensity quantification shows ATP5A levels are significantly higher in LacQ140\_2M and LacQ140\_A mice compared to WT or LacQ140 mice (**b**, \* $p < 0.05$ , \*\* $p < 0.01$ , \*\*\* $p < 0.001$ , One-way ANOVA with Tukey's multiple comparison test,  $n=6$ ).

Peak area analysis in 12-month-old mice shows no significant change in GFAP levels in LacQ140 or WT mice. There is a significant decrease in DARPP32 levels in LacQ140\_8M and LacQ140\_2M compared to LacQ140\_A mice (**c**, \* $p < 0.05$ , One-way ANOVA with Tukey's multiple comparison test,  $n=6$ ). Total pixel intensity quantification for each band using ImageJ software shows no changes in ATP5A levels in any of the LacQ140 or WT mice.

# Supplementary Figure 5

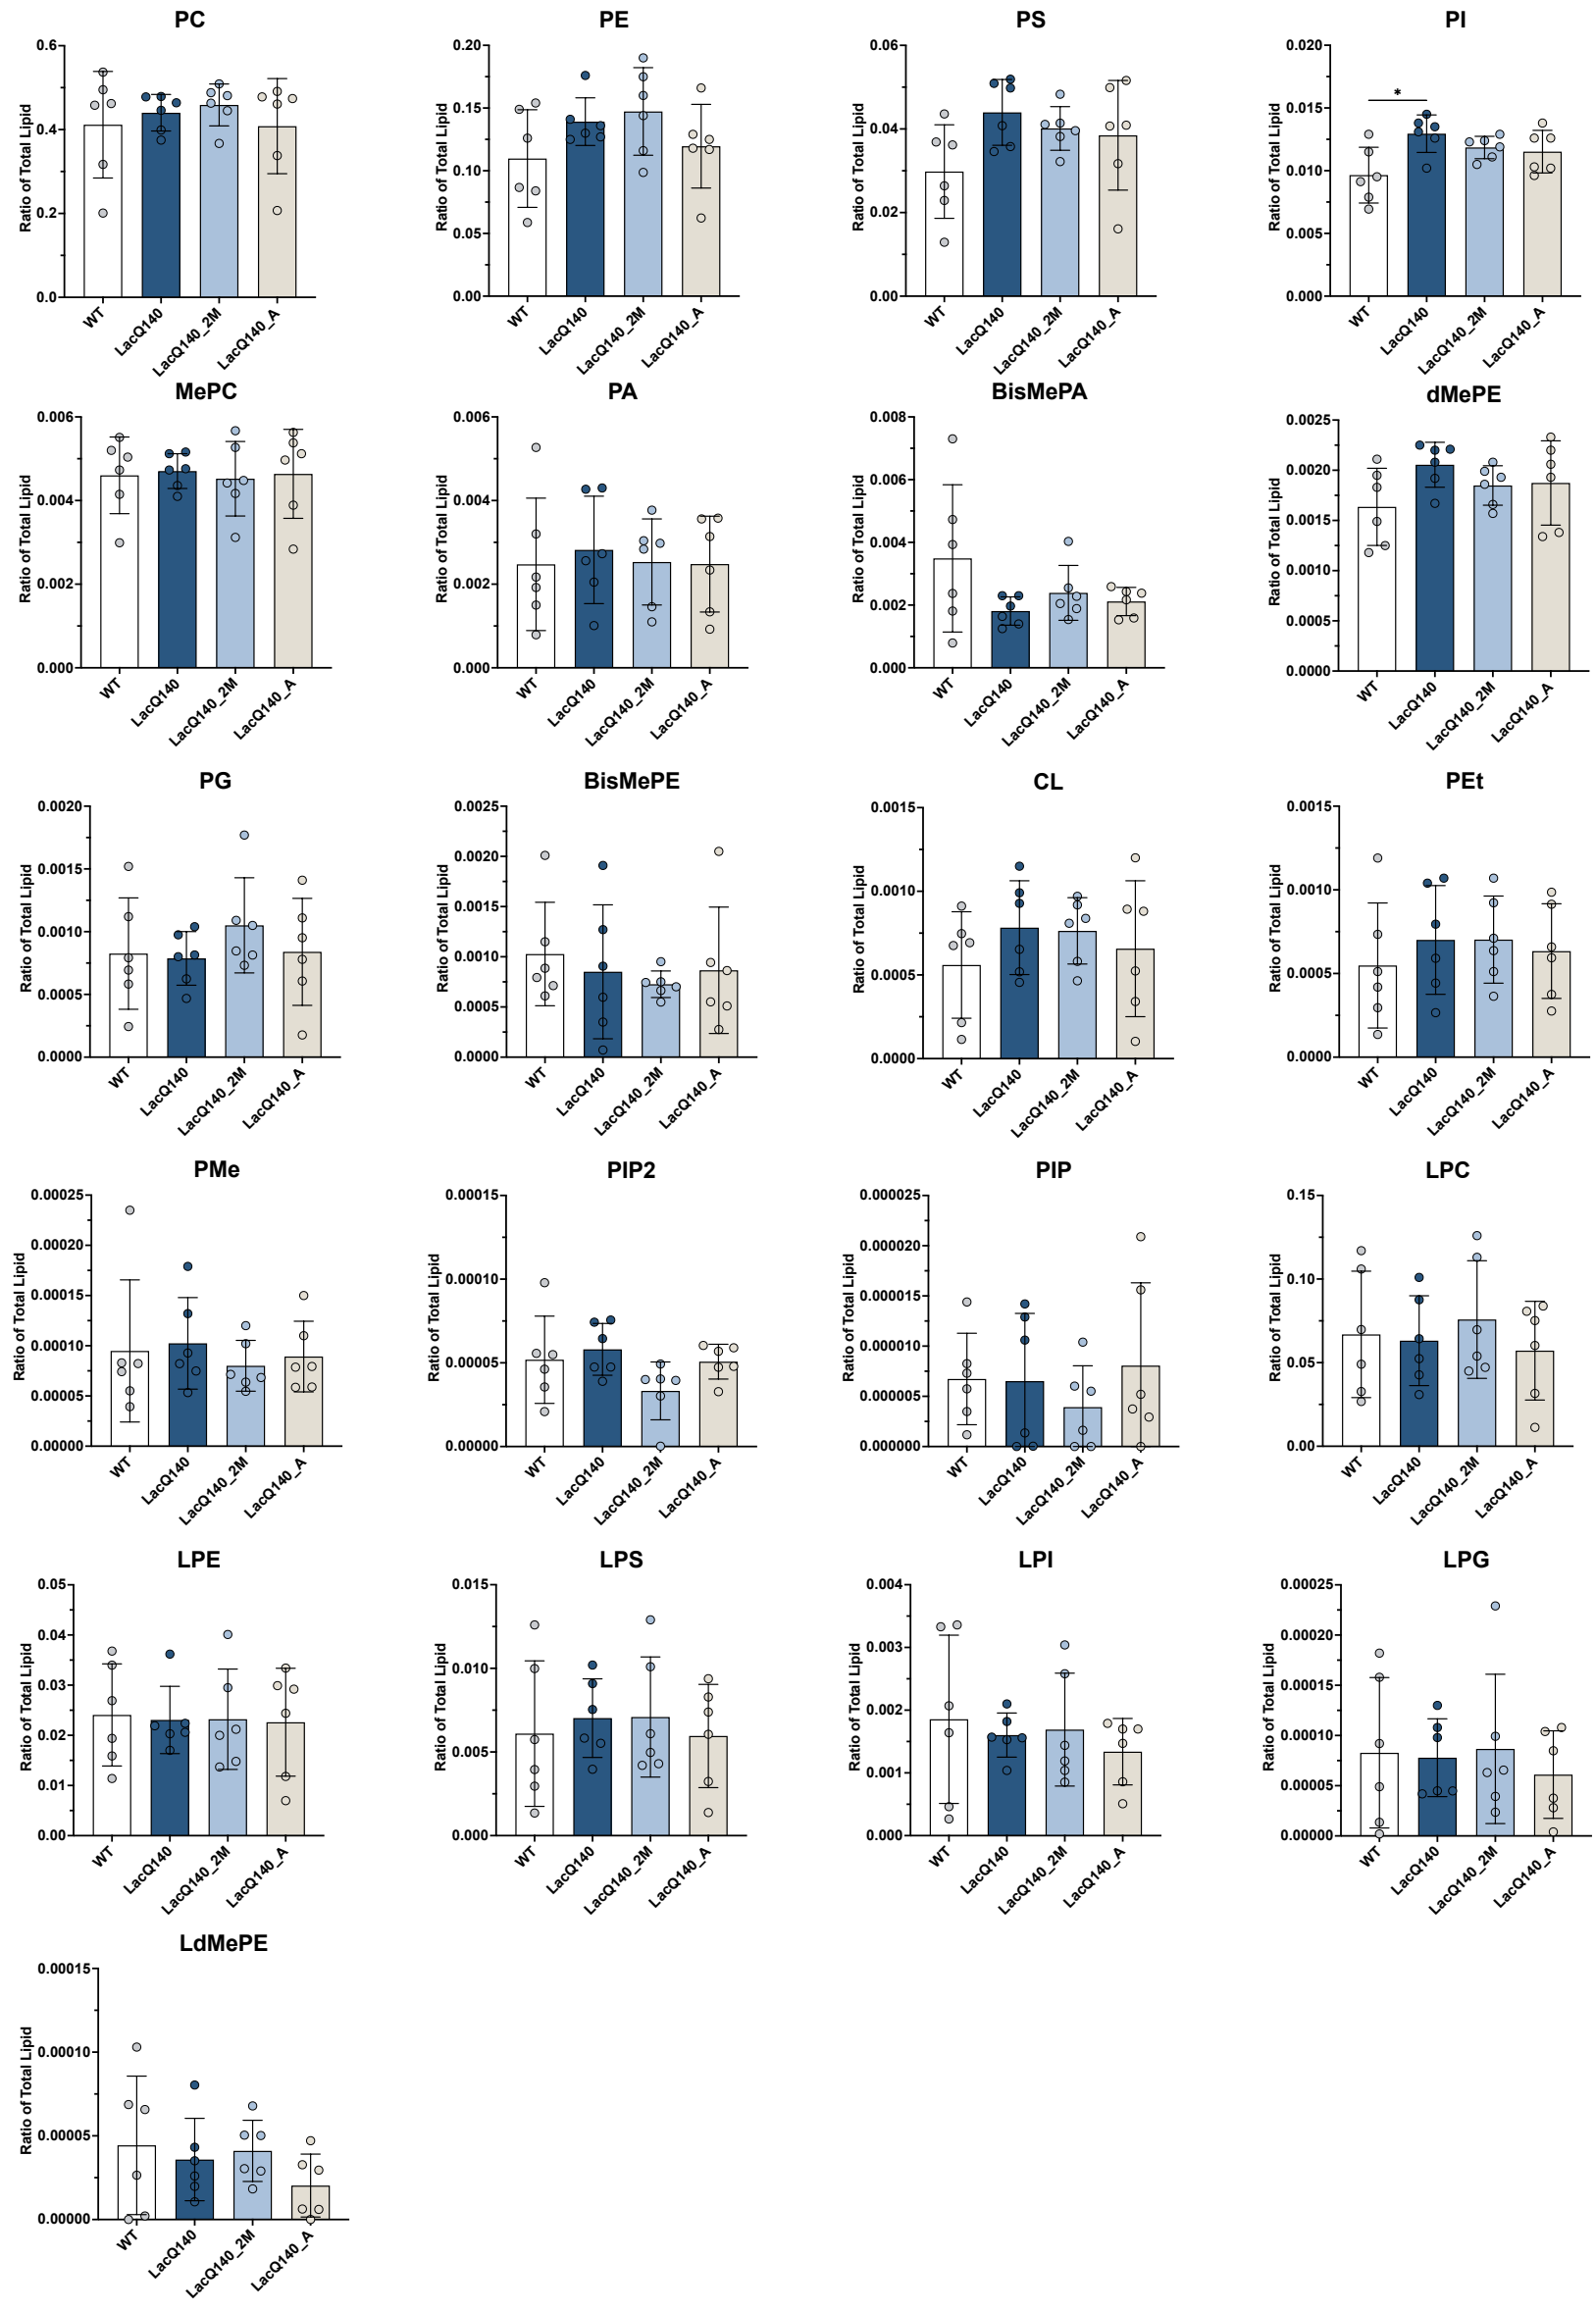



### **Supplementary Figure 5. Glycerophospholipid subclasses detected in striatum of 6-month-old mice.**

Lipids were extracted and analyzed by LC-MS/MS. Graphs show relative intensities for indicated lipid subclasses expressed as a ratio of total lipid intensity per sample for each genotype or treatment group. Plotted values represent summed lipid subclass intensity standardized to total amount of lipid detected in the same sample. Bar charts underneath individual points represent group means and error bars are  $\pm$  standard deviation. The subclass phosphatidylinositol (PI) was significantly increased in striatum of 6-month-old LacQ140 mice compared to WT mice (One-way ANOVA with Tukey's multiple comparisons test,  $F(3, 20) = 4.176$ , \*  $P=0.0189$ ,  $n=6$ ). This increase is not significant when p-values are adjusted for multiple testing using the Benjamini, Krieger and Yekutieli procedure with a false discovery rate of 5%, ( $q = 0.7144$ ,  $n=36$ ). No changes between groups were found in any other glycerophospholipid subclasses. Abbreviations: Phosphatidylcholine (PC), Phosphatidylethanolamine (PE), Phosphatidylserine (PS), Phosphatidylinositol (PI), Methylphosphocholine (MePC), Phosphatidic acid (PA), Bis-methyl phosphatidic acid (BisMePA), Dimethyl phosphatidylethanolamine (dMePE), Phosphatidylglycerol (PG), Bis-methyl phosphatidylethanolamine (BisMePE), Cardiolipin (CL), Phosphatidylethanol (PEt), Phosphatidylmethanol (PMe), Phosphatidylinositol-bisphosphate (PIP2), Phosphatidylinositol-monophosphate (PIP), Lysophosphatidylcholine (LPC), Lysophosphatidylethanolamine (LPE), Lysophosphatidylserine (LPS), Lysophosphatidylinositol (LPI), Lysophosphatidylglycerol (LPG), Lysodimethyl phosphatidylethanolamine (LdMePE).

# Supplementary Figure 6

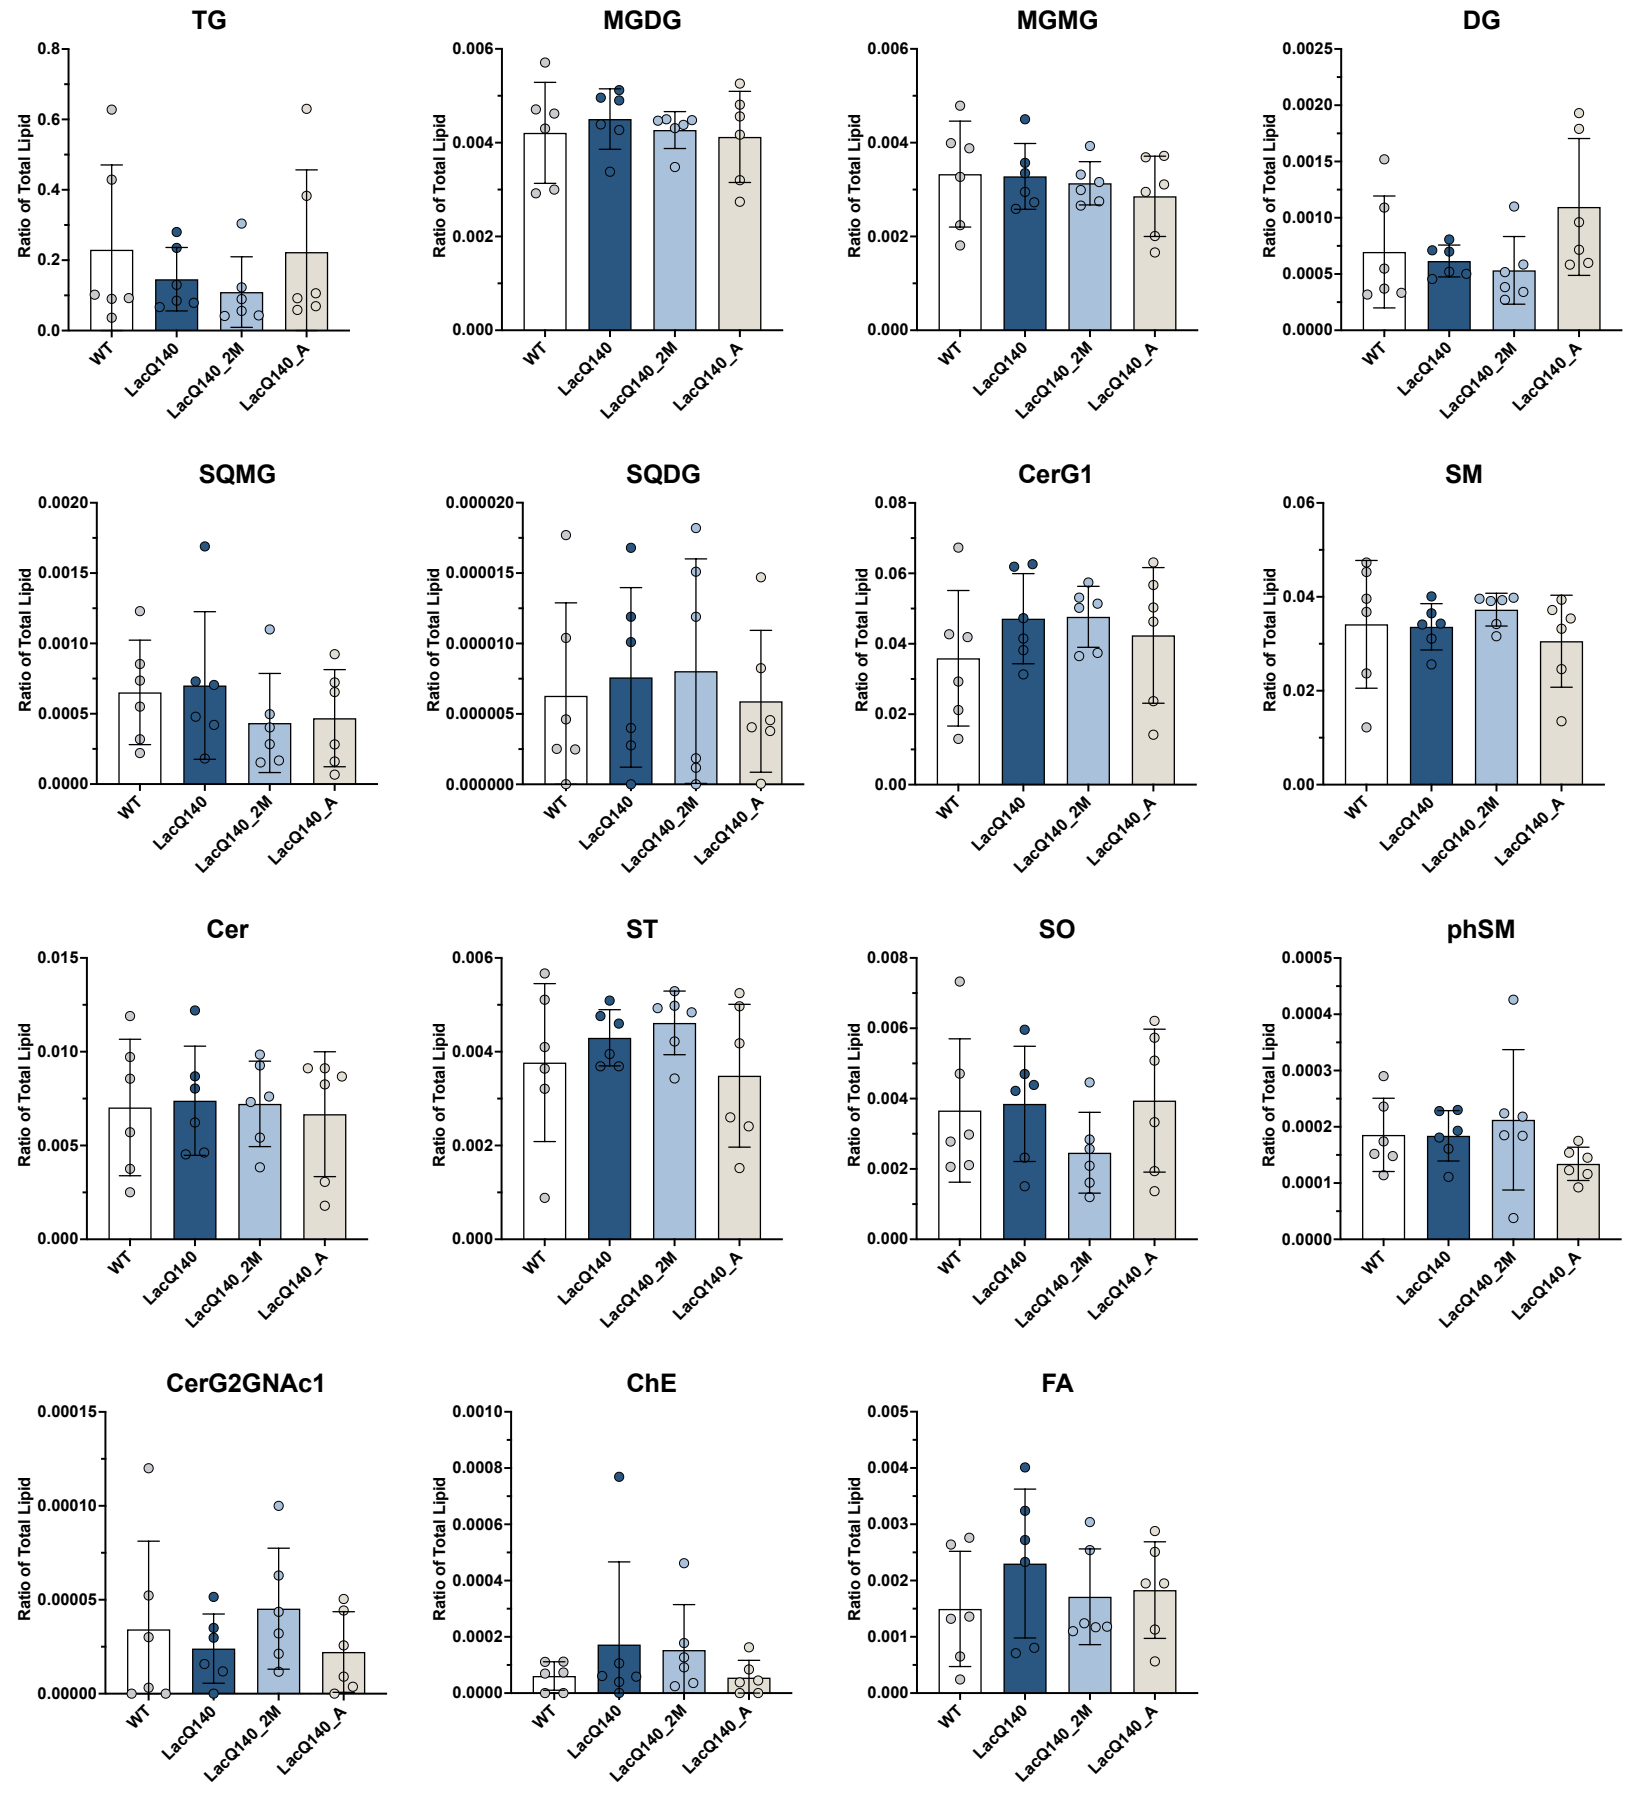

**Supplementary Figure 6. Glycerolipid, sphingolipid, sterol lipid, fatty acyl subclasses detected in striatum of 6-month-old mice.**

Lipids were extracted and analyzed by LC-MS/MS. Graphs show relative intensities for indicated lipid subclasses expressed as a ratio of total lipid intensity per sample for each genotype or treatment group. Plotted values represent summed lipid subclass intensity standardized to total amount of lipid detected in the same sample. Bar charts underneath individual points represent group means and error bars are  $\pm$  standard deviation. No changes between groups were found in any glycerolipid, sphingolipid, sterol lipid, or fatty acyl subclasses (One-way ANOVA with Tukey's multiple comparison test,  $n=6$ ). Abbreviations: Glycerolipids: Triglyceride (TG), Monogalactosyldiacylglycerol (MGDG), Monogalactosylmonoacylglycerol (MGMG), Diglyceride (DG), Sulfoquinovosylmonoacylglycerol (SQMG), Sulfoquinovosyldiacylglycerol (SQDG), Sphingolipids: Simple Glc series (CerG1), Sphingomyelin (SM), Ceramide (Cer), Sulfatide (ST), Sphingoid base (So), Sphingomyelin phytosphingosine (phSM), Simple Glc series (CerG2GNAc1), Sterol lipids: Cholesterol ester (ChE), Fatty acyls: Fatty acid (FA).

# Supplementary Figure 7

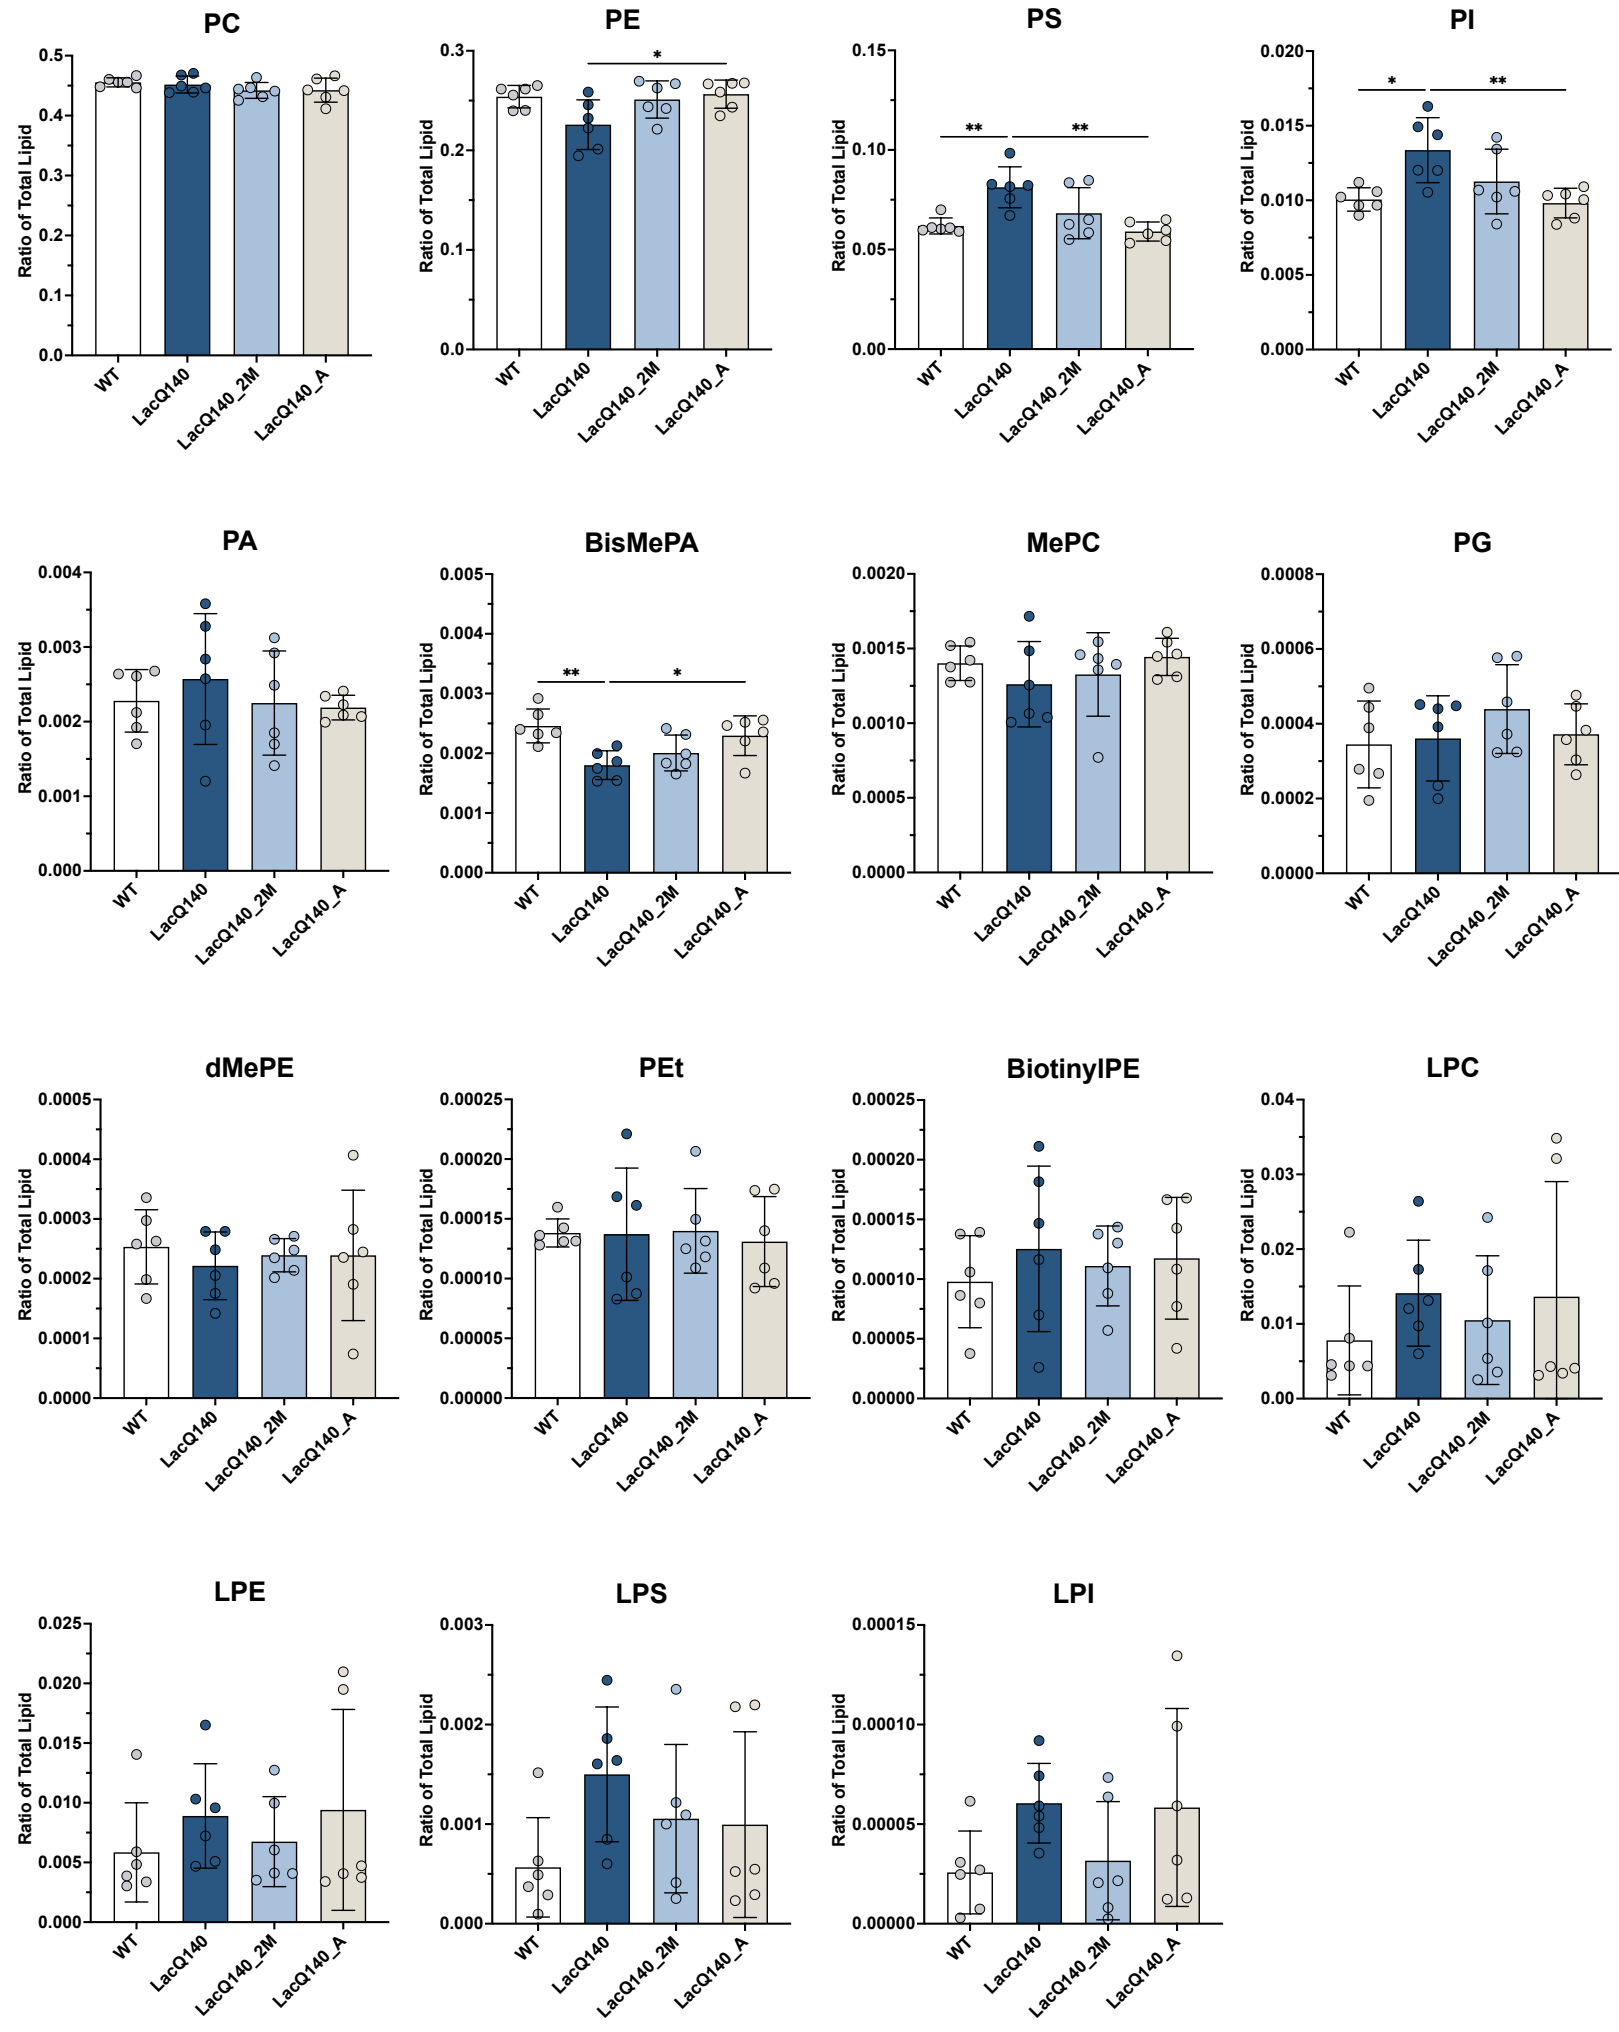

### Supplementary Figure 7. Glycerophospholipid subclasses detected in striatum of 9-month-old mice.

Lipids were extracted and analyzed by LC-MS/MS. Graphs show relative intensities for indicated lipid subclasses expressed as a ratio of total lipid intensity per sample for each genotype or treatment group. Plotted values represent summed lipid subclass intensity standardized to total amount of lipid detected in the same sample. Bar charts underneath individual points represent group means and error bars are  $\pm$  standard deviation. One-way analysis of variance (ANOVA) was used to evaluate differences in lipid subclass intensity between groups and Tukey's multiple comparisons test was used for post-hoc pairwise comparisons (N = 6 mice per group, \* $p < 0.05$ , \*\* $p < 0.01$ , Tukey's multiple comparisons test). To correct for multiple testing the Benjamini, Krieger and Yekutieli procedure was used with a false discovery rate of 5% (n=24) and FDR adjusted p-values are reported as q values. The subclass Phosphatidylethanolamine (PE) was not significantly different between LacQ140 and WT mice, however LacQ140\_A mice displayed increased PE compared to LacQ140 mice (One-way ANOVA with Tukey's multiple comparison test, F (3, 20) = 3.717, \* $P=0.0284$ ). This increase was no longer significant after p-values were corrected (q=0.0563). Phosphatidylserine (PS), Phosphatidylinositol (PI), and Bis-methyl phosphatidic acid (BisMePA) are described in **Figure 7**, PS: F (3, 20) = 7.60, \*\* $P=0.0014$ , q=0.0125, **i**, PI: F (3, 20) = 5.707, \*\* $P=0.0054$ , q=0.0168, **j**, BisMePA: F (3, 20) = 6.086, \*\* $P=0.0041$ , q=0.0168. Abbreviations: Phosphatidylcholine (PC), Phosphatidylethanolamine (PE), Phosphatidylserine (PS), Phosphatidylinositol (PI), Phosphatidic acid (PA), Bis-methyl phosphatidic acid (BisMePA), Methylphosphocholine (MePC), Phosphatidylglycerol (PG), Dimethyl phosphatidylethanolamine (dMePE), Phosphatidylethanol (PEt), Biotinyl-phosphoethanolamine (BiotinylPE), Lysophosphatidylcholine (LPC), Lysophosphatidylethanolamine (LPE), Lysophosphatidylserine (LPS), Lysophosphatidylinositol (LPI).

# Supplementary Figure 8

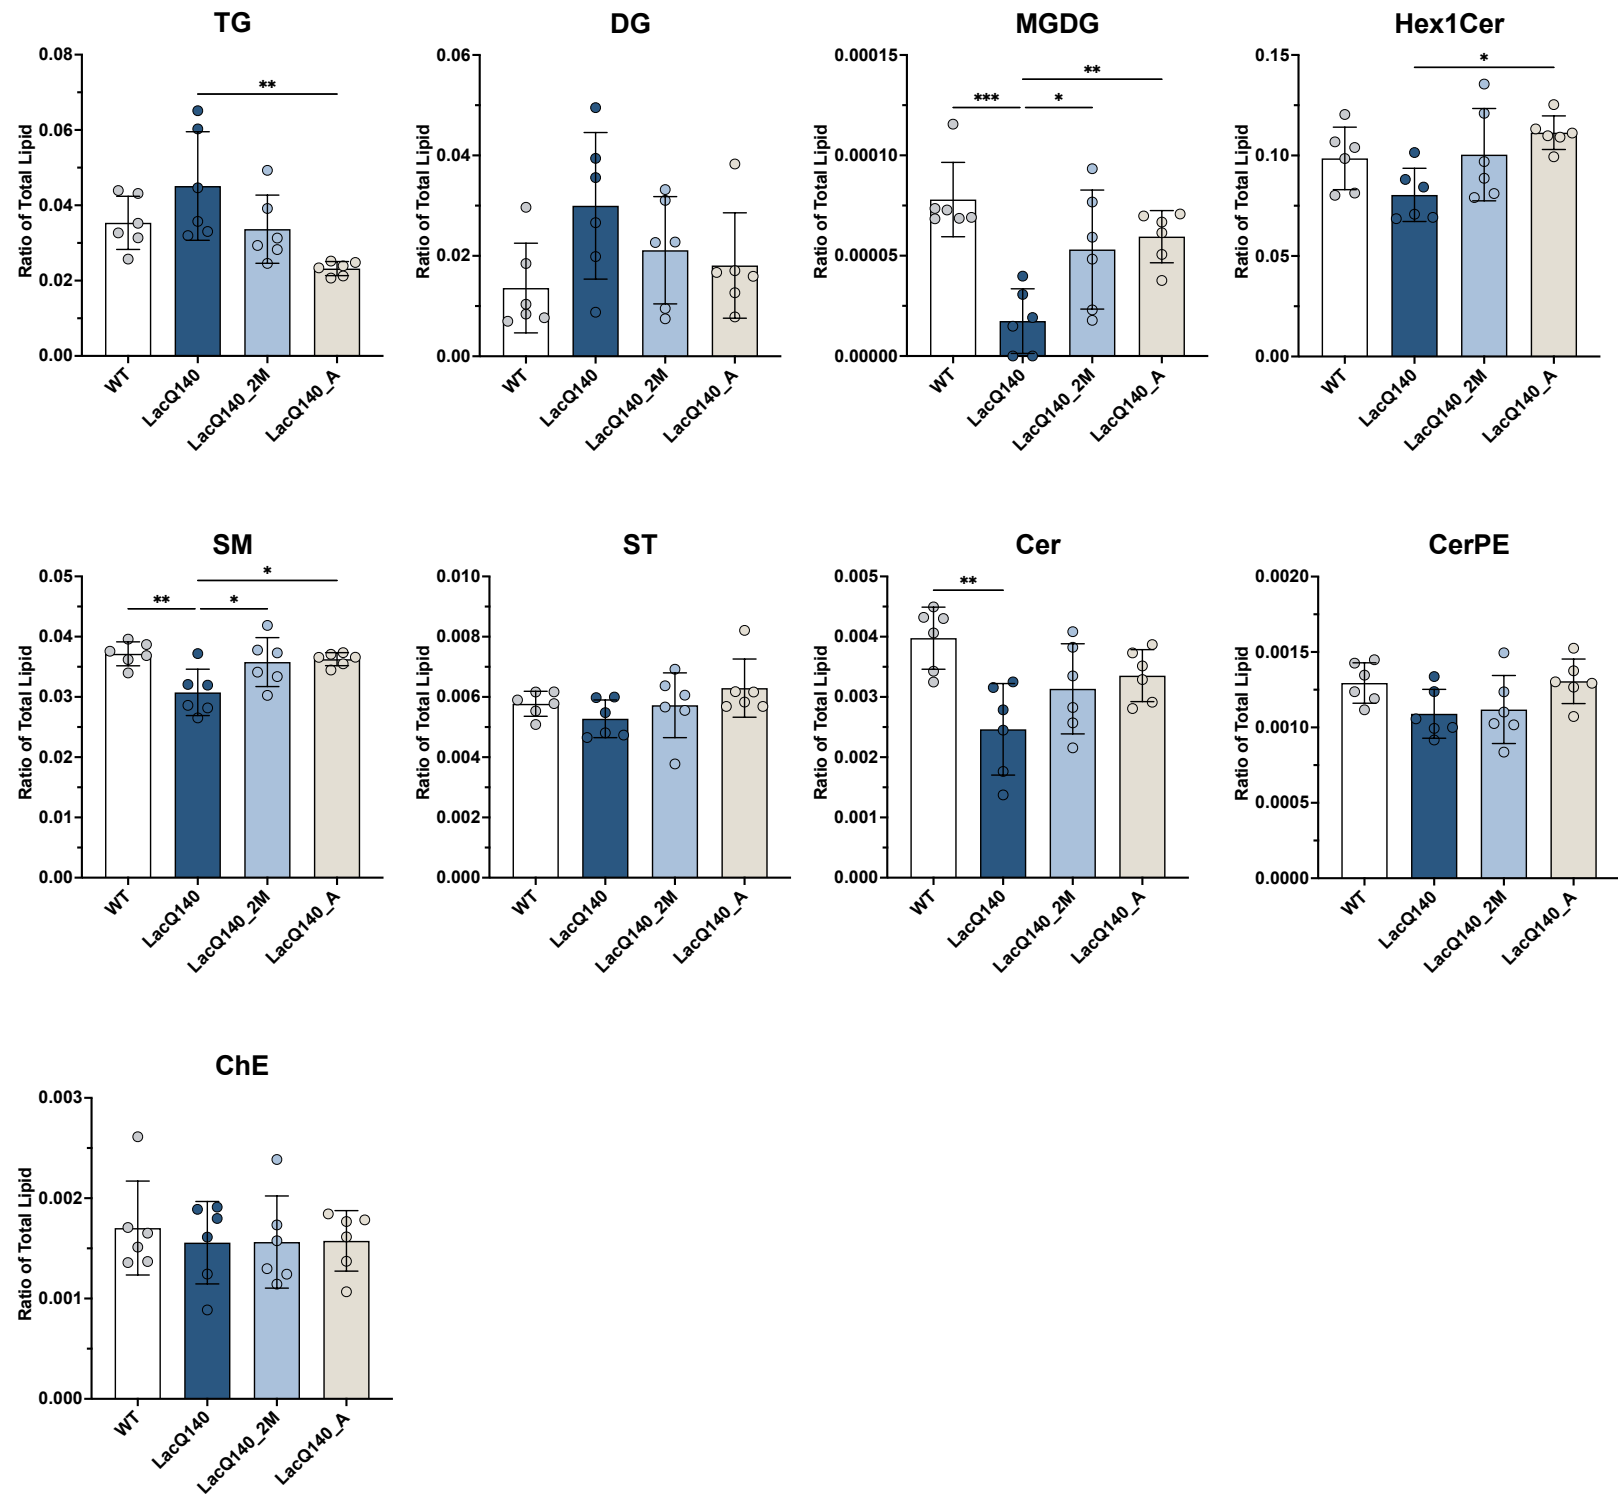

**Supplementary Figure 8. Glycerolipid, sphingolipid, and sterol lipid subclasses detected in striatum of 9-month-old mice.**

Lipids were extracted and analyzed by LC-MS/MS. Graphs show relative intensities for indicated lipid subclasses expressed as a ratio of total lipid intensity per sample for each genotype or treatment group. Plotted values represent summed lipid subclass intensity standardized to total amount of lipid detected in the same sample. Bar charts underneath individual points represent group means and error bars are  $\pm$  standard deviation. One-way analysis of variance (ANOVA) was used to evaluate differences in lipid subclass intensity between groups and Tukey's multiple comparisons test was used for post-hoc pairwise comparisons (N = 6 mice per group, \* $p < 0.05$ , \*\* $p < 0.01$ , \*\*\* $p < 0.001$ , Tukey's multiple comparisons test). To correct for multiple testing the Benjamini, Krieger and Yekutieli procedure was used with a false discovery rate of 5% (n=24), FDR adjusted p-values are reported as q values. The glycerolipid subclass triglyceride (TG) was unchanged between LacQ140 and WT mice, however, LacQ140\_A mice displayed decreased levels of TG compared to LacQ140 mice. (One-way ANOVA with Tukey's multiple comparison test  $F(3, 20) = 5.637$ , \*\* $P=0.0057$ ,  $q=0.0168$ ). The sphingolipid subclass Hexosylceramide (Hex1Cer) was unchanged between LacQ140 and WT mice but LacQ140\_A mice displayed increased levels of Hex1Cer compared to LacQ140 mice (One-way ANOVA with Tukey's multiple comparison test  $F(3, 20) = 3.891$ , \* $P=0.0243$ ). This increase in Hex1Cer no longer significant after p-values were corrected ( $q=0.0542$ ). Monogalactosyldiacylglycerol (MGDG), Sphingomyelin (SM) and Ceramide (Cer) are described in **Figure 7**, MGDG:  $F(3, 20) = 9.350$ , \*\*\* $P=0.0005$ ,  $q=0.0089$ , SM:  $F(3, 20) = 5.465$ , \*\* $P=0.0066$ ,  $q=0.0168$ , Cer:  $F(3, 20) = 5.883$ , \*\* $P=0.00480$ ,  $q=0.0168$ . Abbreviations: Glycerolipids: Triglyceride (TG), Diglyceride (DG), Monogalactosyldiacylglycerol (MGDG), Sphingolipids: Hexosylceramide (Hex1Cer), Sphingomyelin (SM), Sulfatide (ST), Ceramide (Cer), Ceramide phosphorylethanolamine (CerPE), Sterol lipids: Cholesterol ester (ChE).

# Supplementary Figure 9

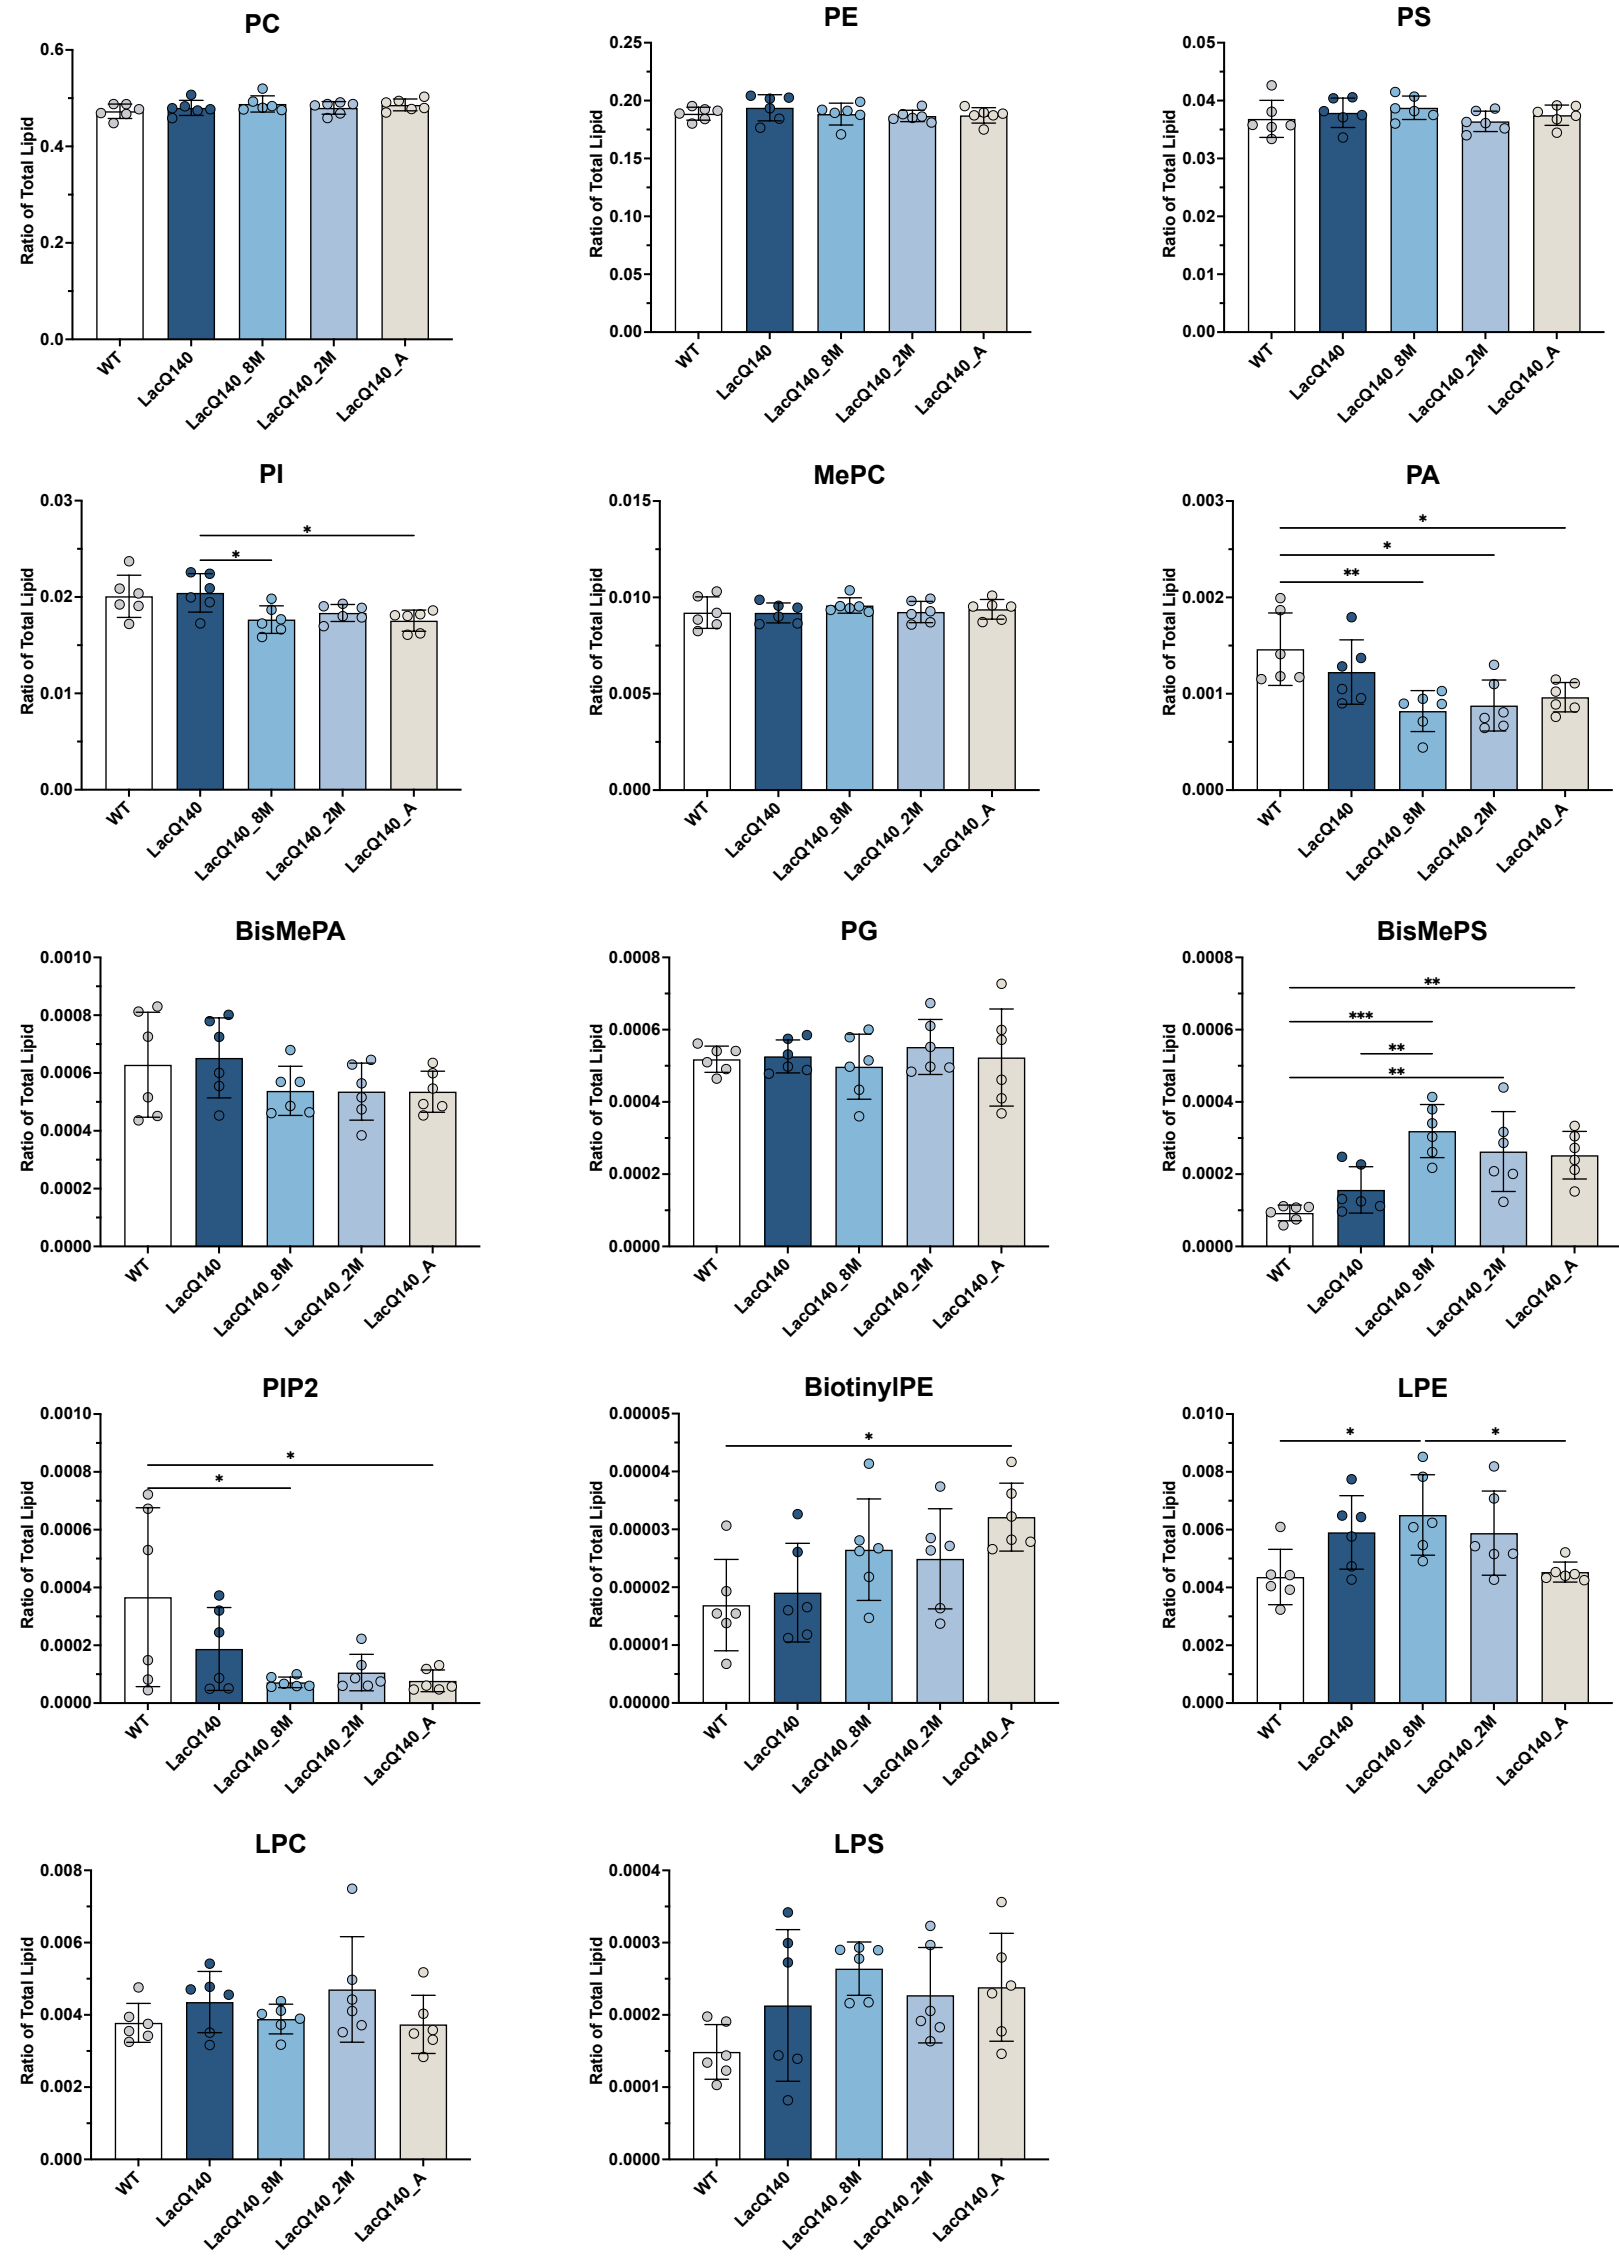



### Supplementary Figure 9. Glycerophospholipid subclasses detected in striatum of 12-month-old mice.

Lipids were extracted and analyzed by LC-MS/MS. Graphs show relative intensities for indicated lipid subclasses expressed as a ratio of total lipid intensity per sample for each genotype or treatment group. Plotted values represent summed lipid subclass intensity standardized to total amount of lipid detected in the same sample. Bar charts underneath individual points represent group means and error bars are  $\pm$  standard deviation. One-way analysis of variance (ANOVA) was used to evaluate differences in lipid subclass intensity between groups and Tukey's multiple comparisons test was used for post-hoc pairwise comparisons (N = 6 mice per group, \* $p < 0.05$ , \*\* $p < 0.01$ , \*\*\* $p < 0.001$ , Tukey's multiple comparisons test). To correct for multiple testing the Benjamini, Krieger and Yekutieli procedure was used with a false discovery rate of 5% (n=29), FDR adjusted p-values are reported as q values. Phosphatidylinositol (PI) was decreased in both LacQ140\_8M and LacQ140\_A mice compared to LacQ140 mice (F (4, 25) = 4.316, \*\* $P=0.0086$ ,  $q=0.0338$ ). Phosphatidic acid (PA) was decreased in LacQ140\_8M, LacQ140\_2M, and LacQ140\_A mice compared to WT mice (F (4, 25) = 5.537, \*\* $P=0.0025$ ,  $q=0.0184$ ). Bis-methylphosphatidylserine (BisMePS) was increased in LacQ140\_8M, LacQ140\_2M, and LacQ140\_A mice compared to WT mice. Additionally, it was increased in LacQ140\_2M mice compared to LacQ140 mice (F (4, 25) = 9.308, \*\*\*\* $P<0.0001$ ,  $q=0.0022$ ). Phosphatidylinositol-bisphosphate (PIP2) was decreased in LacQ140\_8M and LacQ140\_A mice compared to WT mice (F (4, 25) = 3.743, \* $P=0.0161$ ,  $q=0.0394$ ). Biotinyl-phosphoethanolamine (BiotinylPE) was increased in LacQ140\_A mice compared to WT mice (F (4, 25) = 3.446, \* $P=0.0225$ ,  $q=0.0451$ ). Lysophosphatidylethanolamine (LPE) was increased in LacQ140\_8M mice compared to WT mice and decreased in LacQ140\_A mice compared to LacQ140\_8M mice (F (4, 25) = 3.957, \* $P=0.0127$ ,  $q=0.035$ ). Abbreviations: Phosphatidylcholine (PC), Phosphatidylethanolamine (PE), Phosphatidylserine (PS), Phosphatidylinositol (PI), Methylphosphocholine (MePC), Phosphatidic acid (PA), Bis-methyl phosphatidic acid (BisMePA), Phosphatidylglycerol (PG), Bis-methylphosphatidylserine (BisMePS), Phosphatidylinositol-bisphosphate (PIP2), Biotinyl-phosphoethanolamine (BiotinylPE), Lysophosphatidylethanolamine (LPE), Lysophosphatidylcholine (LPC), Lysophosphatidylserine (LPS).

# Supplementary Figure 10

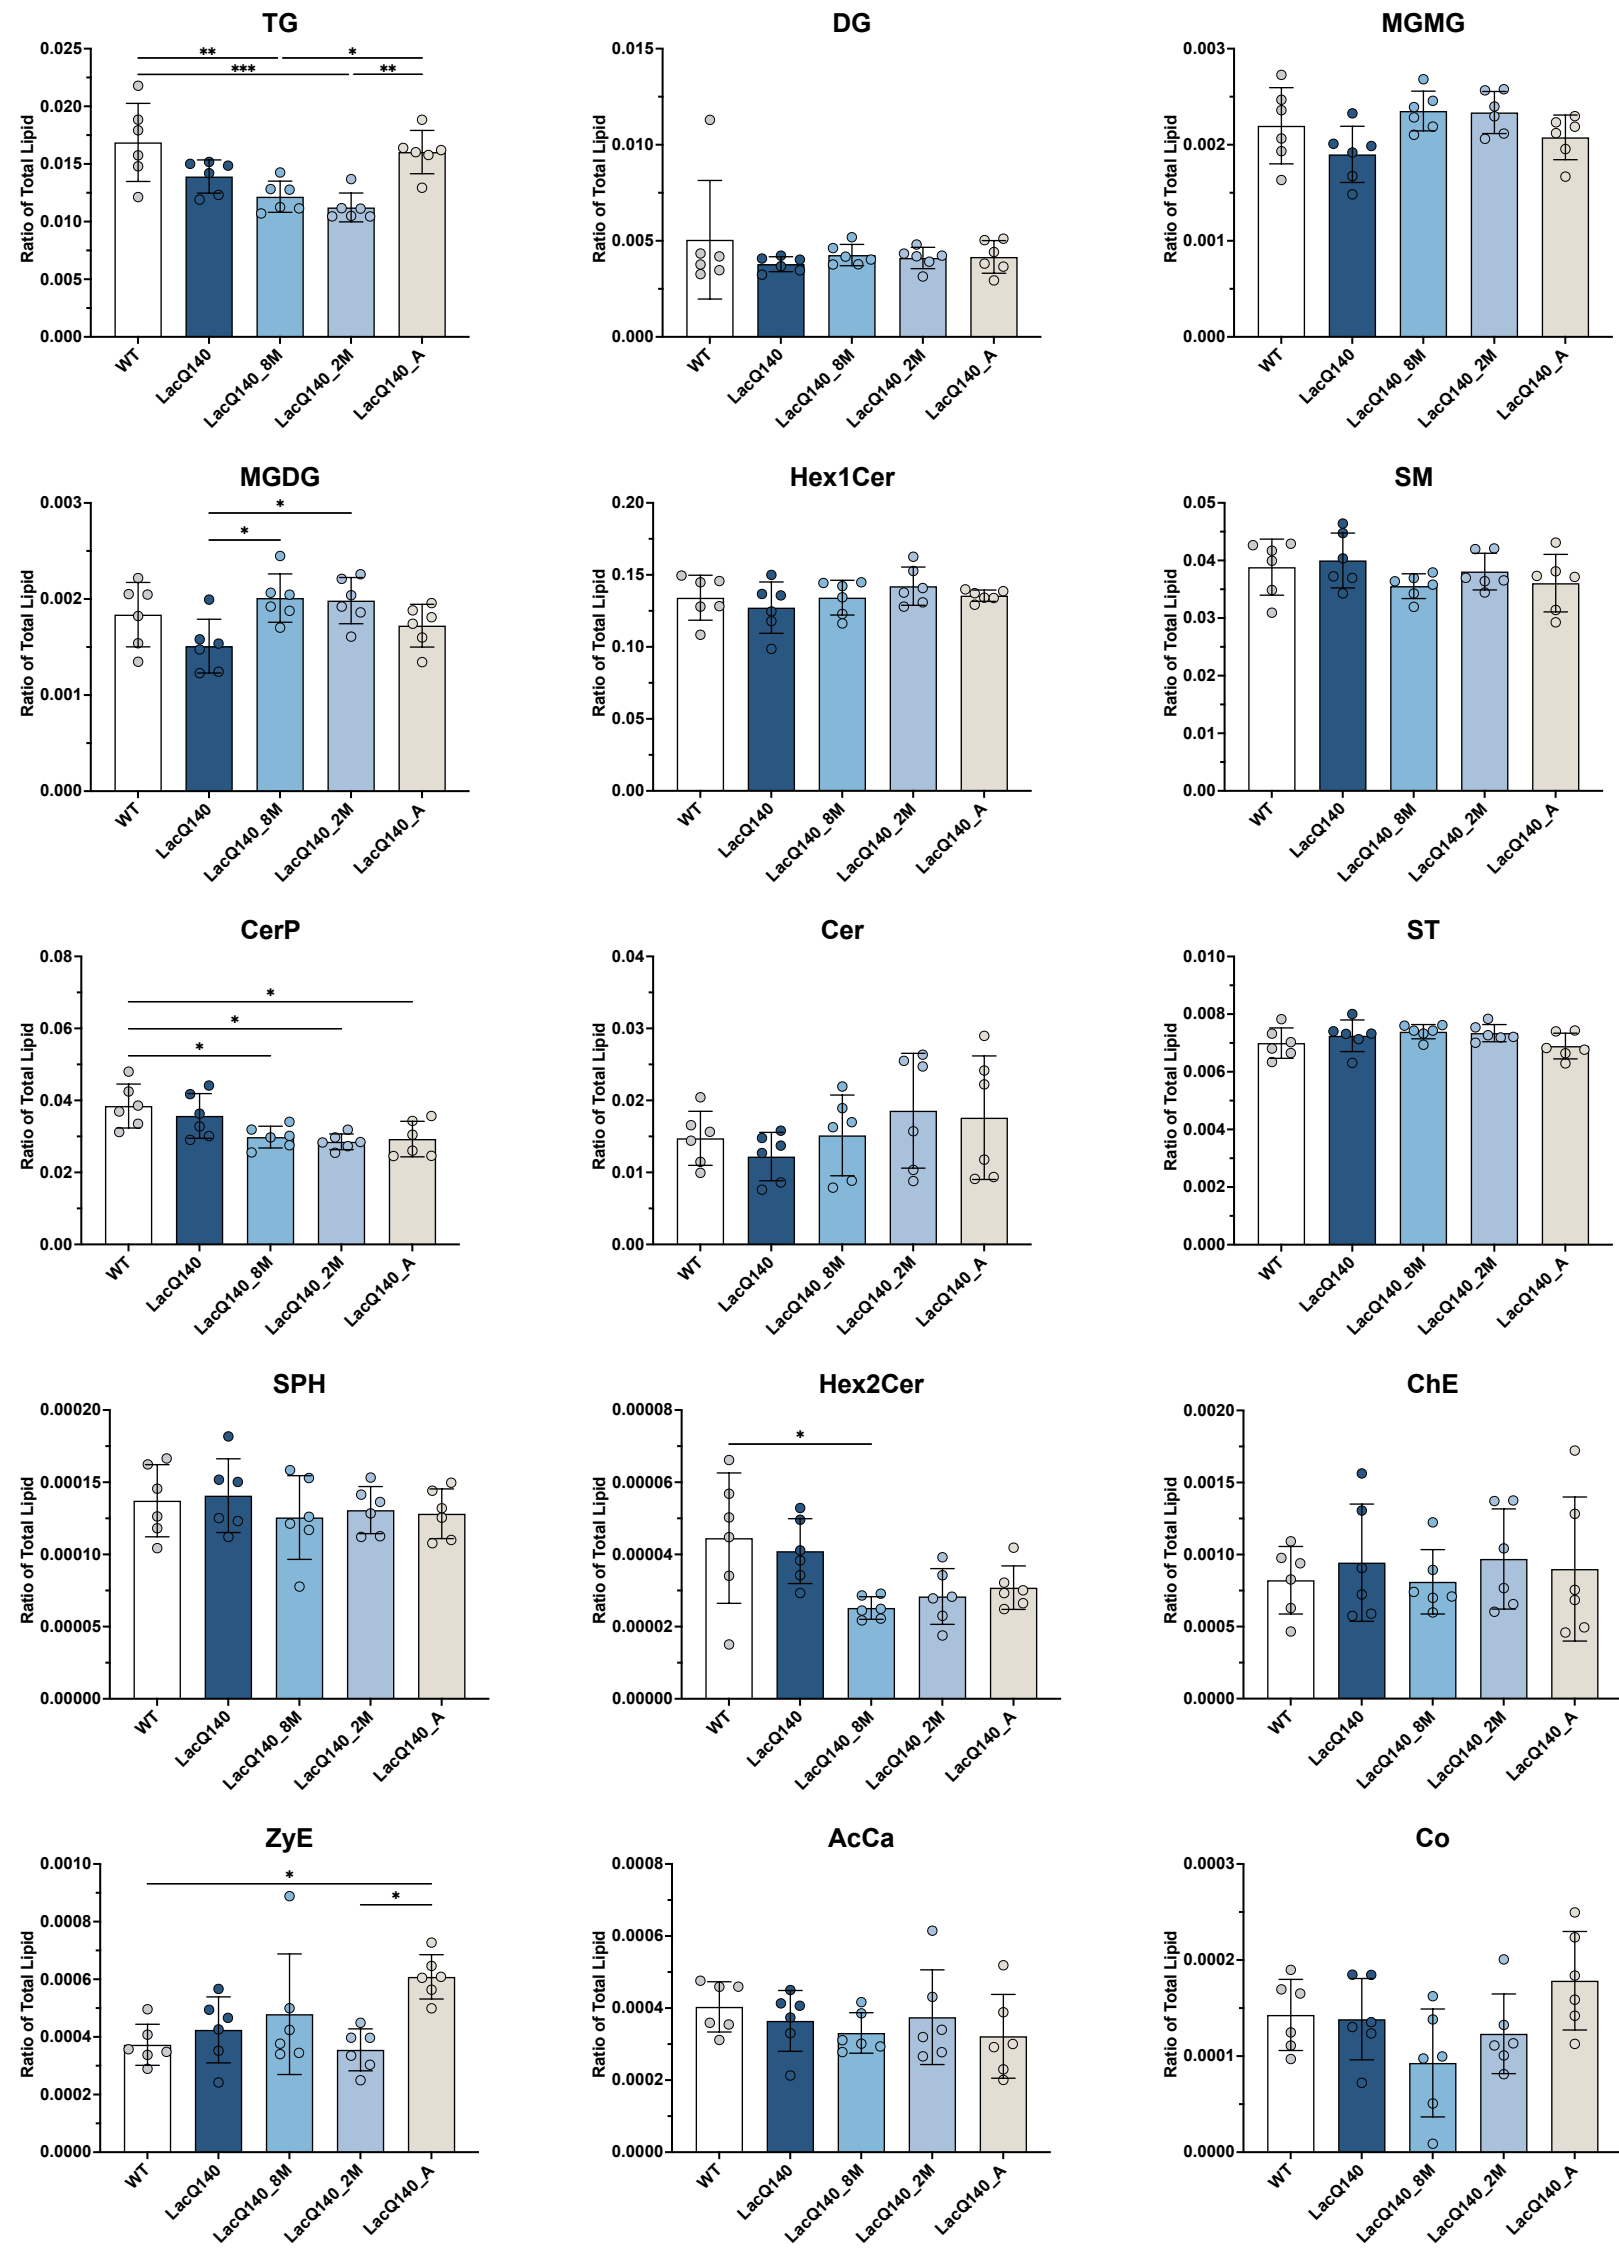

**Supplementary Figure 10. Glycerolipid, sphingolipid, sterol lipid, fatty acyl, and prenol lipid subclasses detected in striatum of 12-month-old mice.**

Lipids were extracted and analyzed by LC-MS/MS. Graphs show relative intensities for indicated lipid subclasses expressed as a ratio of total lipid intensity per sample for each genotype or treatment group. Plotted values represent summed lipid subclass intensity standardized to total amount of lipid detected in the same sample. Bar charts underneath individual points represent group means and error bars are  $\pm$  standard deviation. One-way analysis of variance (ANOVA) was used to evaluate differences in lipid subclass intensity between groups and Tukey's multiple comparisons test was used for post-hoc pairwise comparisons (N = 6 mice per group, \* $p < 0.05$ , \*\* $p < 0.01$ , \*\*\* $p < 0.001$ , Tukey's multiple comparisons test). To correct for multiple testing the Benjamini, Krieger and Yekutieli procedure was used with a false discovery rate of 5% (n=29), FDR adjusted p-values are reported as q values. The glycerolipid subclass Triglyceride (TG) was decreased in LacQ140\_8M and LacQ140\_2M mice compared to WT mice. In addition, LacQ140\_A mice had increased levels of TG compared to LacQ140\_8M and LacQ140\_2M mice (F (4, 25) = 8.593, \*\*\* $P=0.0002$ ,  $q=0.0022$ ). Monogalactosylmonoacylglycerol (MGMG) was significantly different by One-way ANOVA (no longer significant following correction) and Tukey's multiple comparisons test did not reveal any significant differences between groups (F (4, 25) = 2.765, \* $P=0.0497$ ,  $q=0.0887$ , ns). Monogalactosyldiacylglycerol (MGDG) was increased in LacQ140\_8M and LacQ140\_2M mice compared to LacQ140 mice (F (4, 25) = 3.491, \* $P=0.0214$ ,  $q=0.0451$ ). The sphingolipid subclass Ceramide phosphate (CerP) was decreased in LacQ140\_8M and LacQ140\_2M, and LacQ140\_A mice compared to WT mice (F (4, 25) = 5.185, \*\* $P=0.0035$ ,  $q=0.0193$ ). Dihexosylceramide (Hex2Cer) was decreased in LacQ140\_8M mice compared to WT mice (F (4, 25) = 4.076, \* $P=0.0112$ ,  $q=0.035$ ). The sterol lipid subclass Zymosterol (ZyE) was increased in LacQ140\_A mice compared to WT mice and compared to LacQ140\_2M mice (F (4, 25) = 4.256, \*\* $P=0.0092$ ,  $q=0.0338$ ). Abbreviations: Glycerolipids: Triglyceride (TG), Diglyceride (DG), Monogalactosylmonoacylglycerol (MGMG), Monogalactosyldiacylglycerol (MGDG), Sphingolipids: Hexosylceramide (Hex1Cer), Sphingomyelin (SM), Ceramide phosphate (CerP), Ceramide (Cer), Sulfatide (ST), Sphingosine (SPH), Dihexosylceramide (Hex2Cer), Sterol lipids: Cholesterol ester (ChE), Zymosterol (ZyE), Fatty acyls: Acyl Carnitine (AcCa), Prenol lipids: Coenzyme (Co).

# Supplementary Figure 11

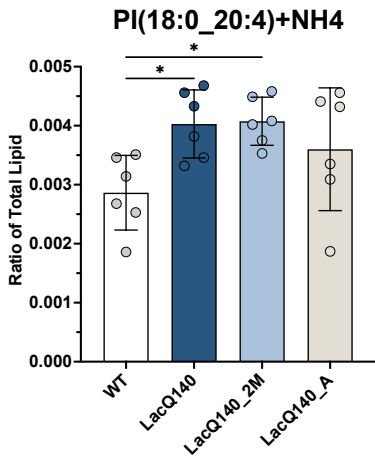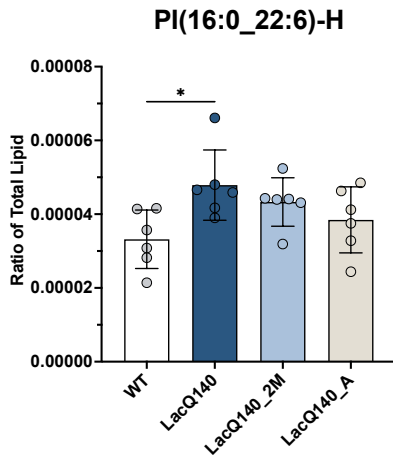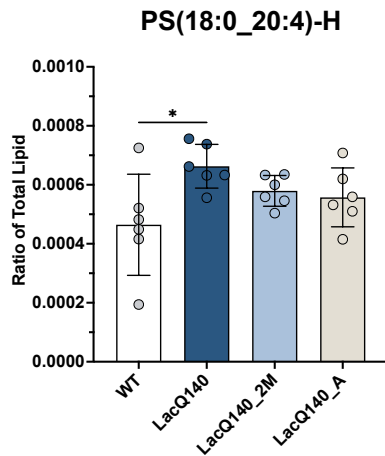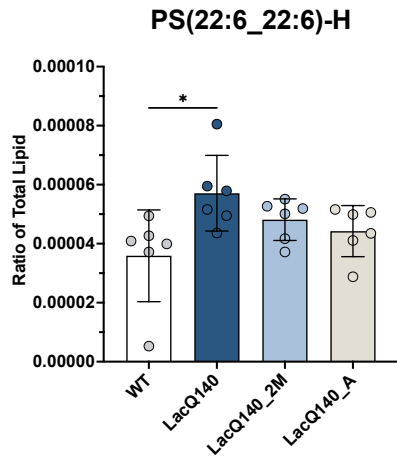

**Supplementary Figure 11. Individual lipid species significantly different between 6-month-old LacQ140 and WT mice (p<0.05).**

Lipids were extracted and analyzed by LC-MS/MS. Graphs show relative intensities for indicated lipid species expressed as a ratio of total lipid intensity per sample for each genotype or treatment group. Plotted values represent individual lipid species intensity standardized to total amount of lipid detected in the same sample. Bar charts underneath individual points represent group means and error bars are  $\pm$  standard deviation. One-way analysis of variance (ANOVA) was used to evaluate differences in lipid species intensity between groups and Tukey's multiple comparisons test was used for post-hoc pairwise comparisons (N = 6 mice per group, \*p < 0.05, Tukey's multiple comparisons test). To correct for multiple testing over all lipids analyzed, the Benjamini, Krieger and Yekutieli procedure was used with a false discovery rate of 5% (n=800), FDR adjusted p-values are reported as q values. No individual species found to be different by one-way ANOVA were significant following correction of p-values. Additional statistical details are available in **Supplemental Table 1** and **Prism File A**. Abbreviations: Glycerophospholipids: Phosphatidylinositol (PI), Phosphatidylserine (PS)

# Supplementary Figure 12

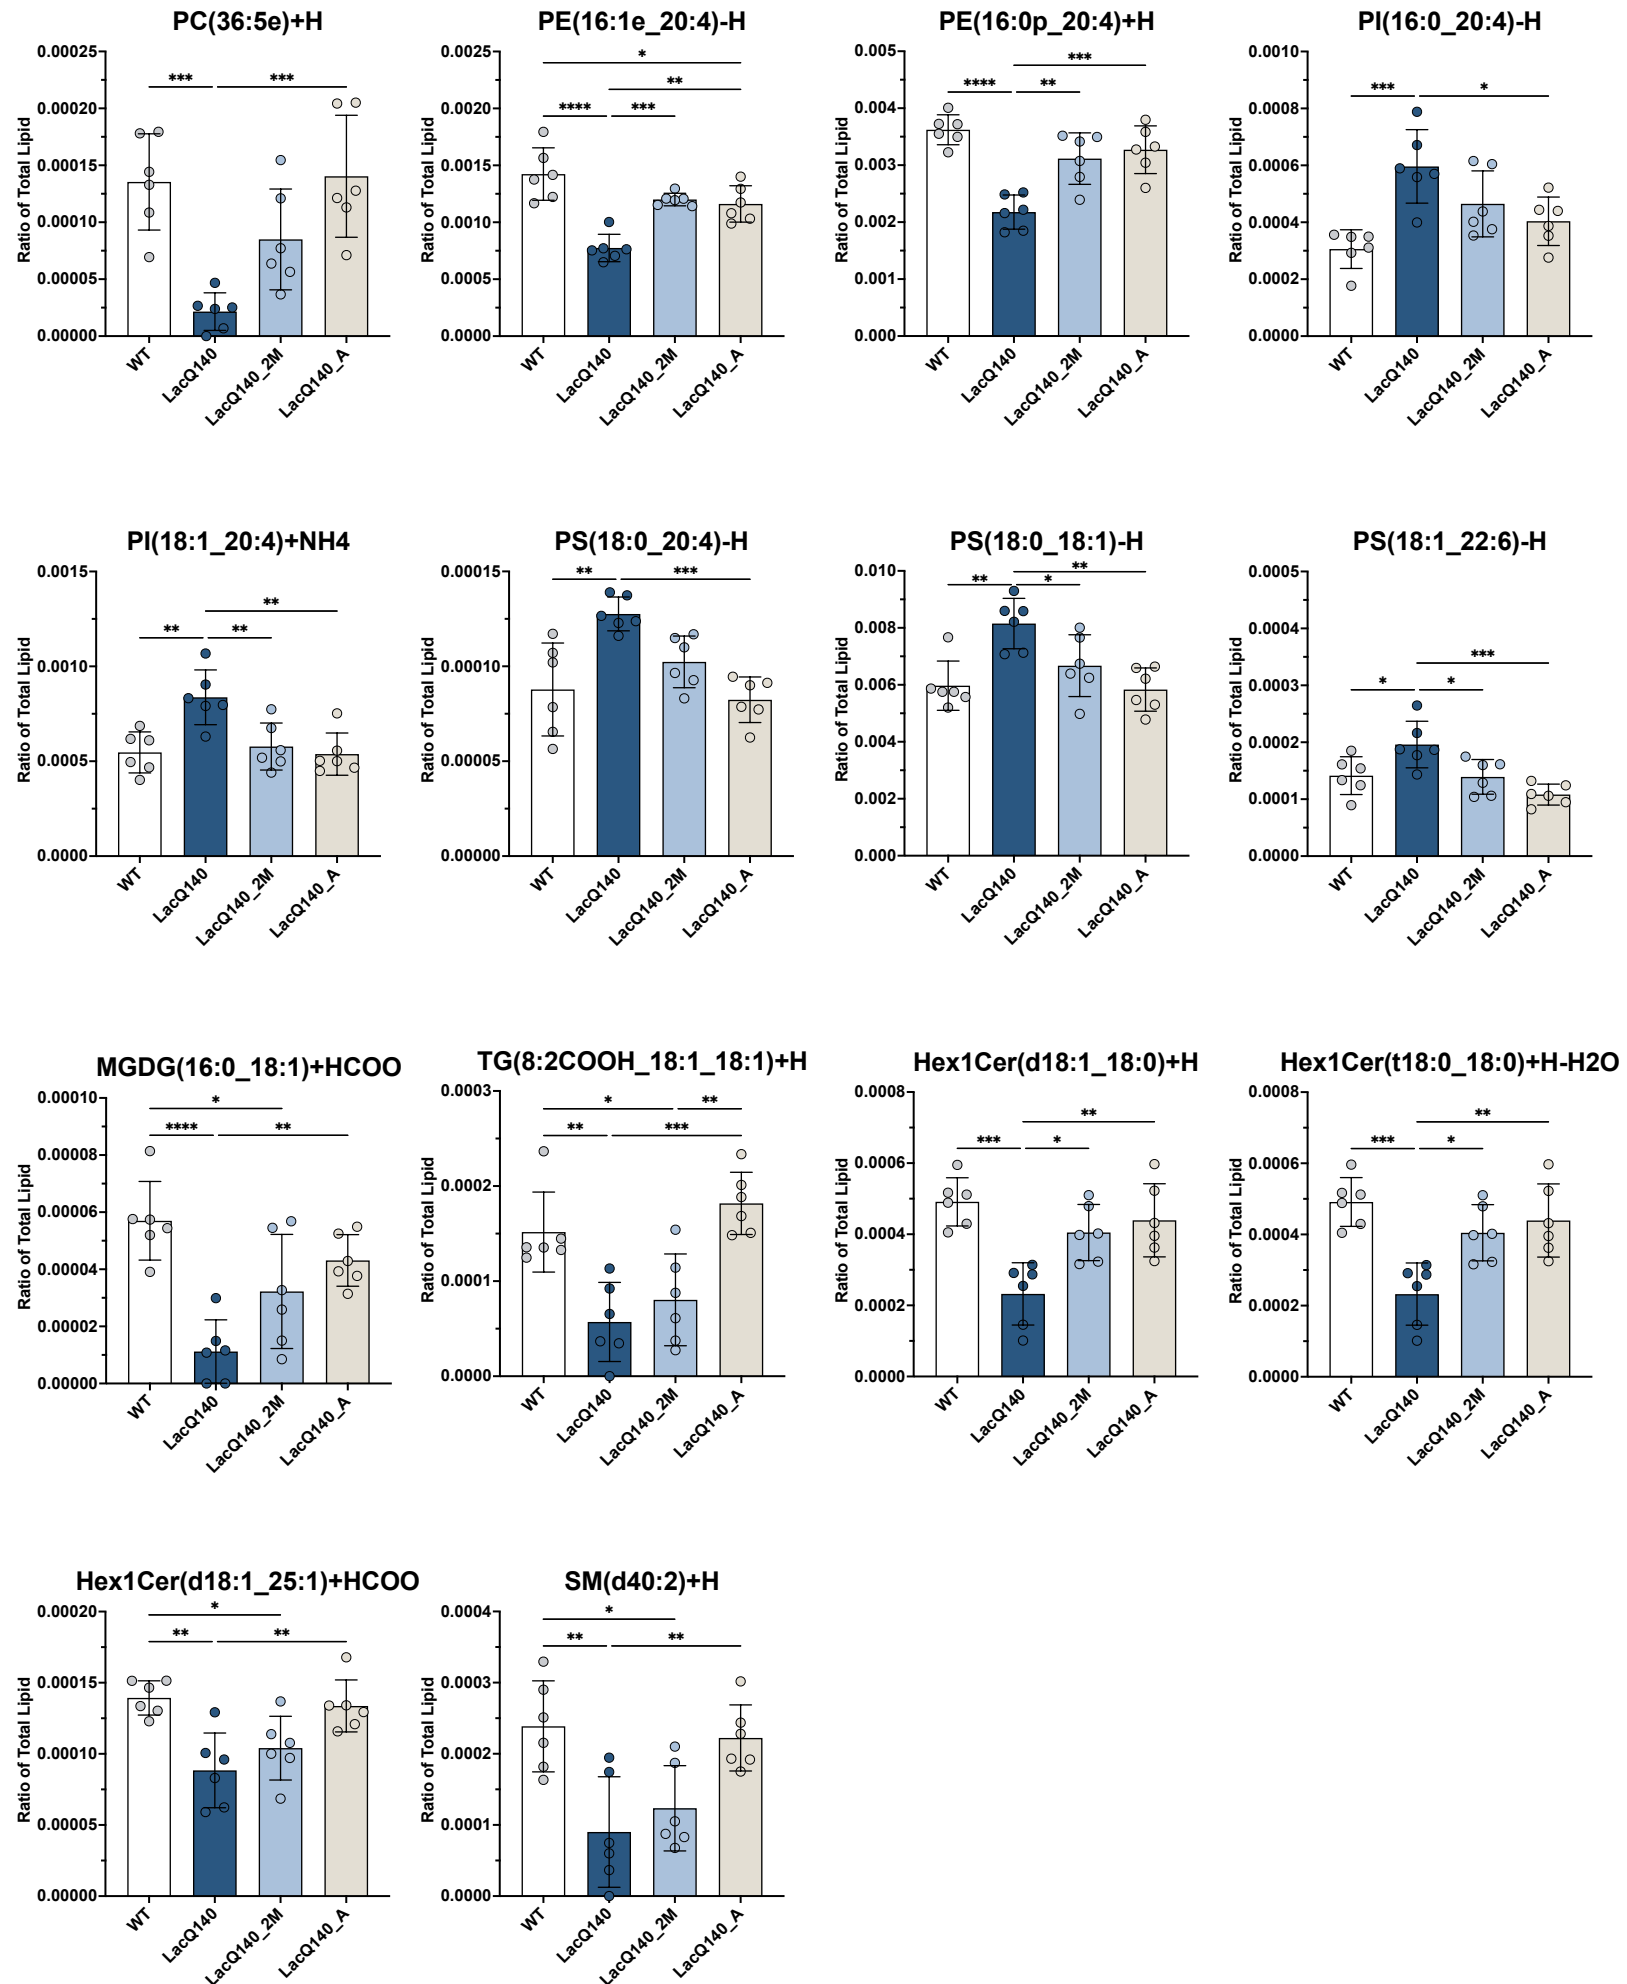

**Supplementary Figure 12. Individual lipid species significantly different between 9-month-old LacQ140 and WT mice (q<0.05).**

Lipids were extracted and analyzed by LC-MS/MS. Graphs show relative intensities for indicated lipid species expressed as a ratio of total lipid intensity per sample for each genotype or treatment group. Plotted values represent individual lipid species intensity standardized to total amount of lipid detected in the same sample. Bar charts underneath individual points represent group means and error bars are  $\pm$  standard deviation. One-way analysis of variance (ANOVA) was used to evaluate differences in lipid species intensity between groups and Tukey's multiple comparisons test was used for post-hoc pairwise comparisons (N = 6 mice per group, \*p < 0.05, \*\*p < 0.01, \*\*\*p < 0.001, \*\*\*\*p < 0.0001, Tukey's multiple comparisons test). To correct for multiple testing over all lipids analyzed, the Benjamini, Krieger and Yekutieli procedure was used with a false discovery rate of 5% (n=632), FDR adjusted p-values are reported as q values. Additional statistical details are available in **Supplementary Table 2** and **Prism File B**. Abbreviations: Glycerophospholipids: Phosphatidylcholine (PC), Phosphatidylethanolamine (PE), Phosphatidylinositol (PI), Phosphatidylserine (PS), Glycerolipids: Monogalactosyldiacylglycerol (MGDG), Triglyceride (TG), Sphingolipids: Hexosylceramide (Hex1Cer), Sphingomyelin (SM).

# Supplementary Figure 13

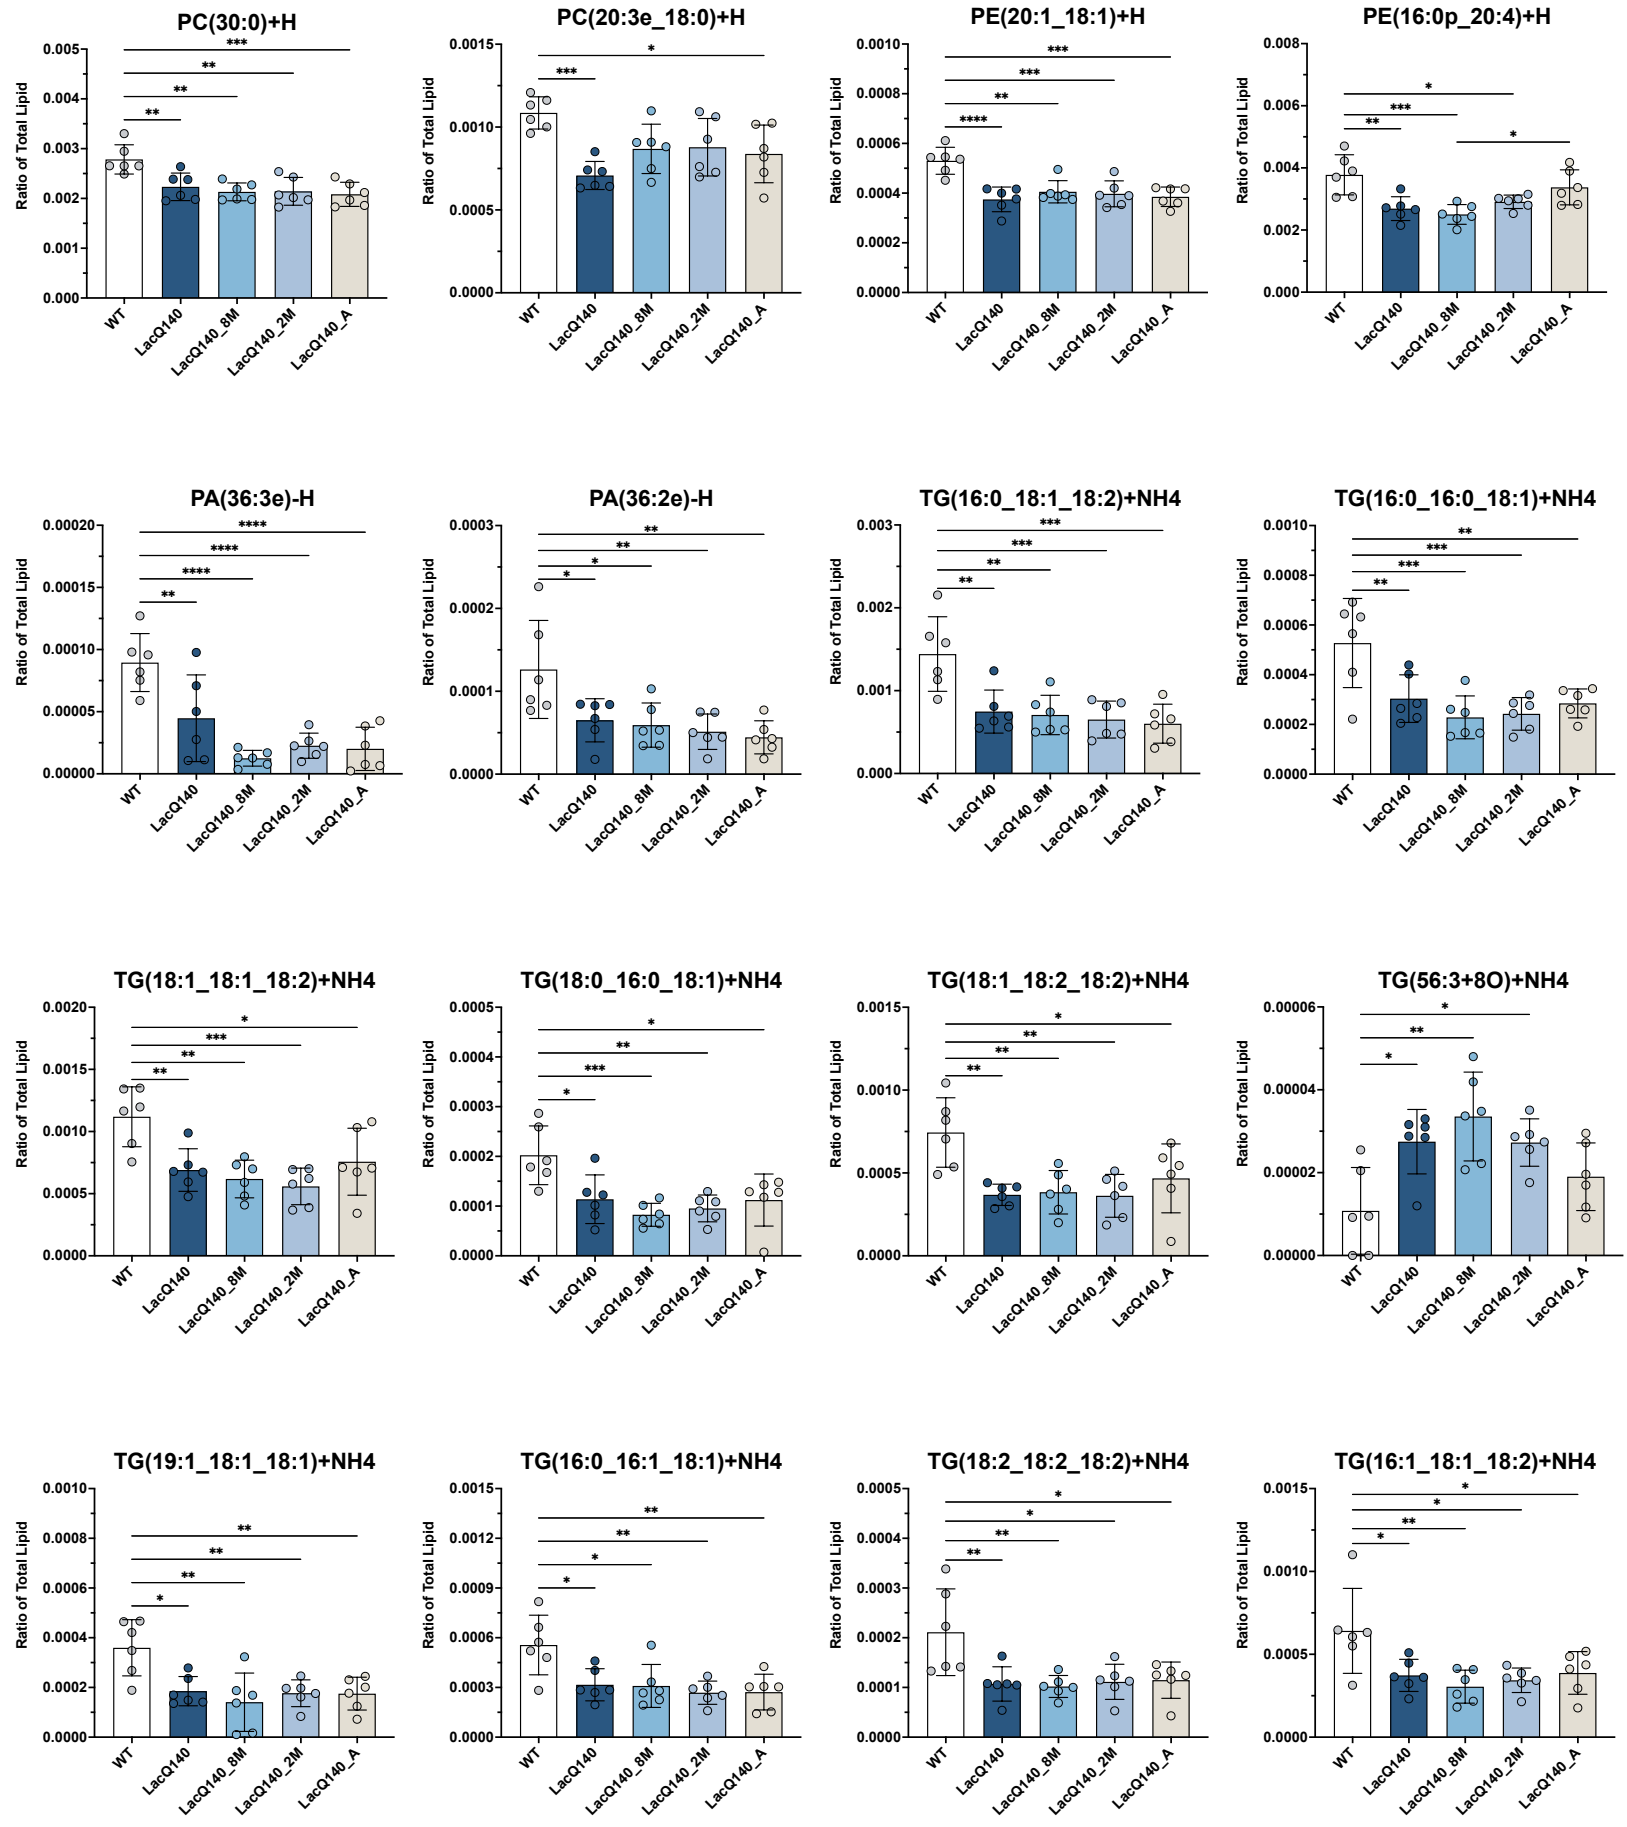



**Supplementary Figure 13. Glycerophospholipid and glycerolipid individual lipid species significantly different between 12-month-old LacQ140 and WT mice (q<0.05).**

Lipids were extracted and analyzed by LC-MS/MS. Graphs show relative intensities for indicated lipid species expressed as a ratio of total lipid intensity per sample for each genotype or treatment group. Plotted values represent individual lipid species intensity standardized to total amount of lipid detected in the same sample. Bar charts underneath individual points represent group means and error bars are  $\pm$  standard deviation. One-way analysis of variance (ANOVA) was used to evaluate differences in lipid species intensity between groups and Tukey's multiple comparisons test was used for post-hoc pairwise comparisons (N = 6 mice per group, \*p < 0.05, \*\*p < 0.01, \*\*\*p < 0.001, \*\*\*\*p < 0.0001, Tukey's multiple comparisons test). To correct for multiple testing over all lipids analyzed, the Benjamini, Krieger and Yekutieli procedure was used with a false discovery rate of 5% (n=735), FDR adjusted p-values are reported as q values. Additional statistical details are available in **Supplementary Table 3** and **Prism File C**.

Abbreviations: Glycerophospholipids: Phosphatidylcholine (PC), Phosphatidylethanolamine (PE), Phosphatidic acid (PA), Glycerolipids: Triglyceride (TG).

# Supplementary Figure 14

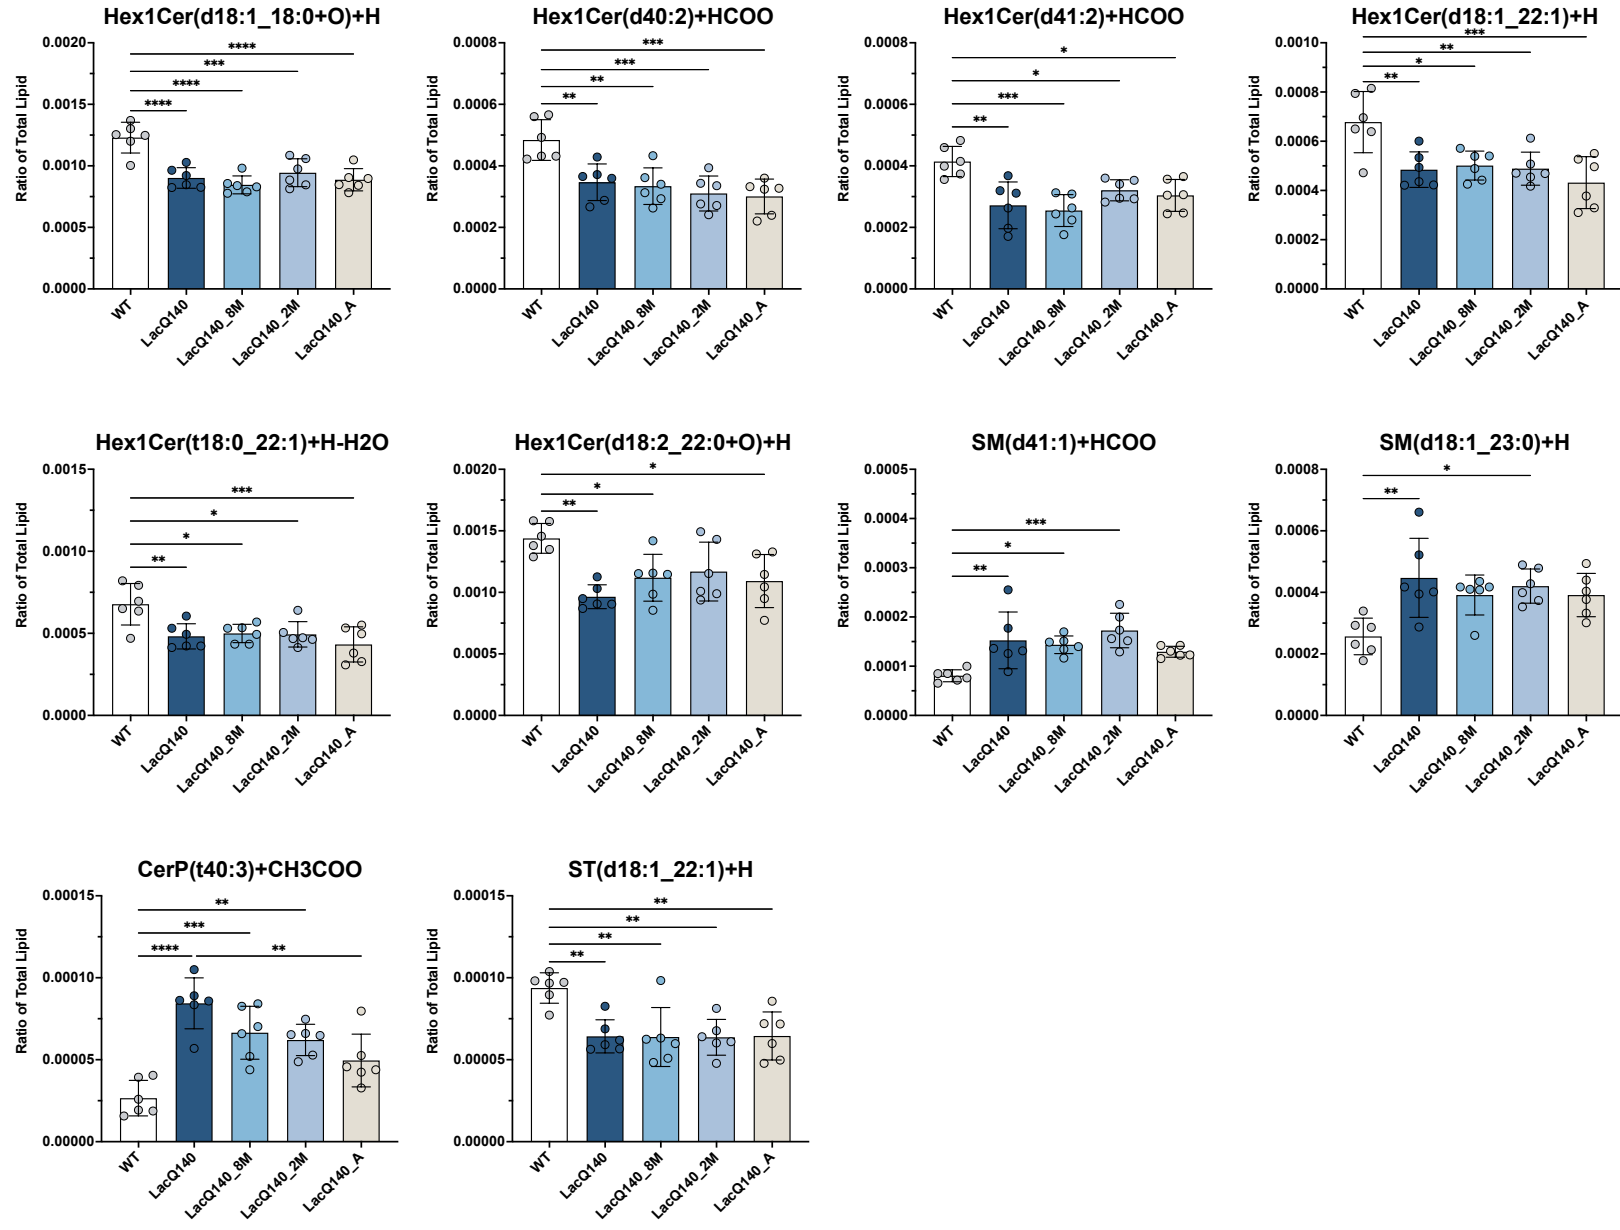

**Supplementary Figure 14. Sphingolipid individual lipid species significantly different between 12-month-old LacQ140 and WT mice (q<0.05).**

Lipids were extracted and analyzed by LC-MS/MS. Graphs show relative intensities for indicated lipid species expressed as a ratio of total lipid intensity per sample for each genotype or treatment group. Plotted values represent individual lipid species intensity standardized to total amount of lipid detected in the same sample. Bar charts underneath individual points represent group means and error bars are  $\pm$  standard deviation. One-way analysis of variance (ANOVA) was used to evaluate differences in lipid species intensity between groups and Tukey's multiple comparisons test was used for post-hoc pairwise comparisons (N = 6 mice per group, \*p < 0.05, \*\*p < 0.01, \*\*\*p < 0.001, \*\*\*\*p < 0.0001 Tukey's multiple comparisons test). To correct for multiple testing over all lipids analyzed, the Benjamini, Krieger and Yekutieli procedure was used with a false discovery rate of 5% (n=735), FDR adjusted p-values are reported as q values. Additional statistical details are available in **Supplementary Table 3** and **Prism File C**. Abbreviations: Sphingolipids: Hexosylceramide (Hex1Cer), Sphingomyelin (SM), Ceramide phosphate (CerP), Sulfatide (ST).

# Supplementary Figure 15

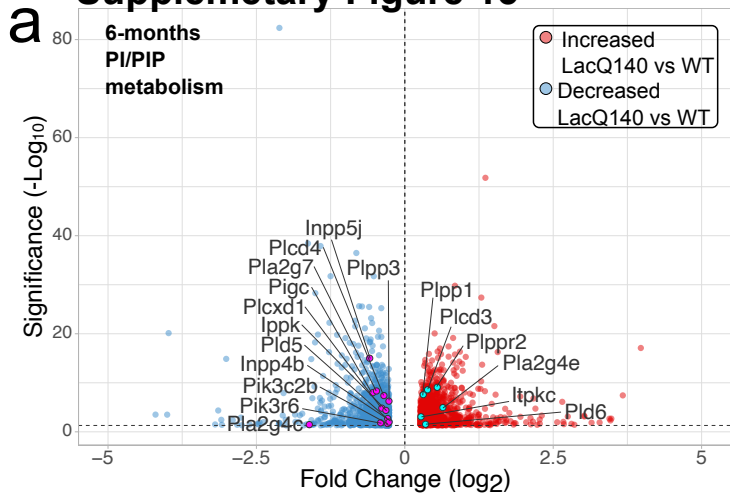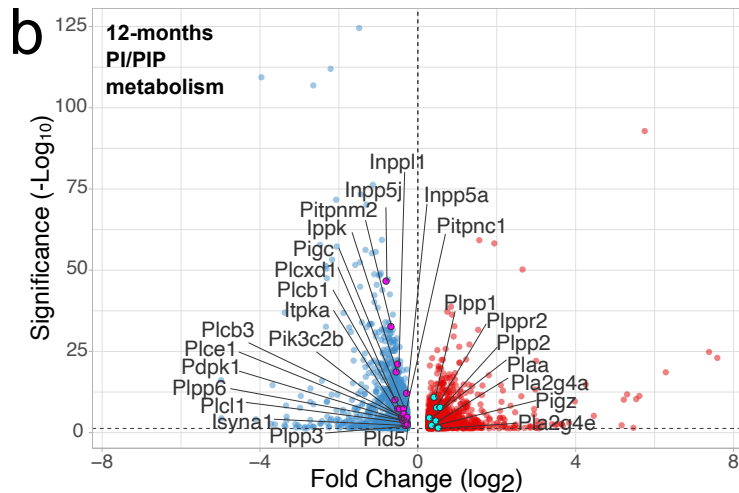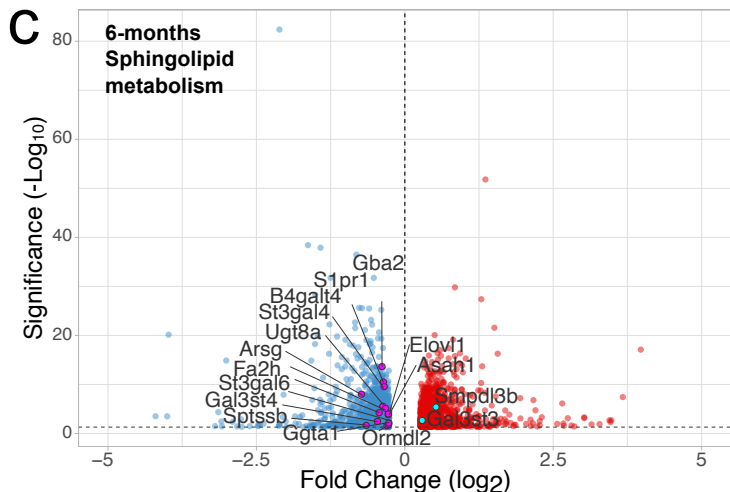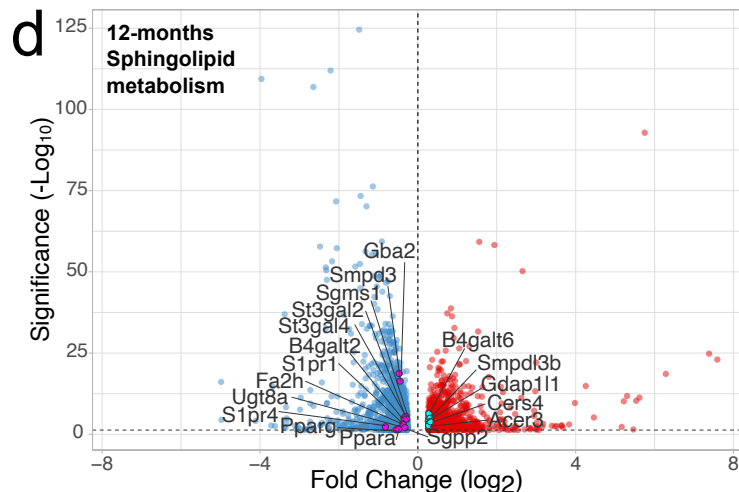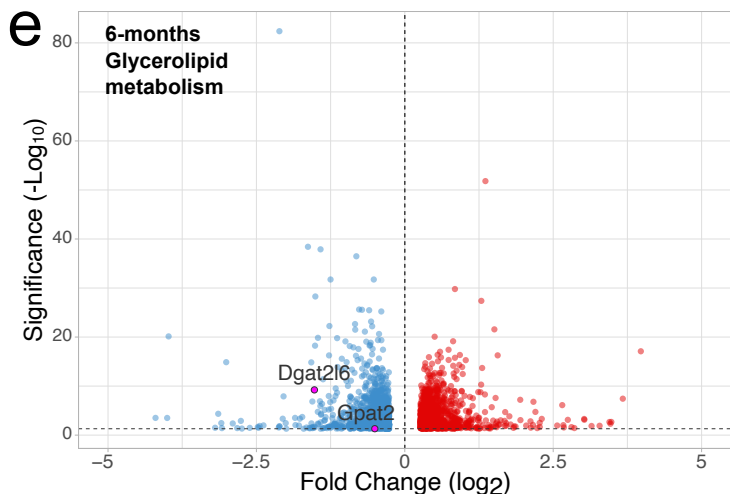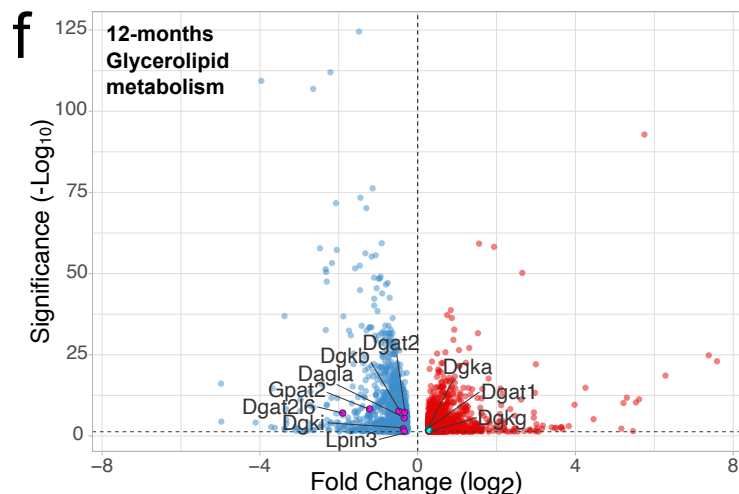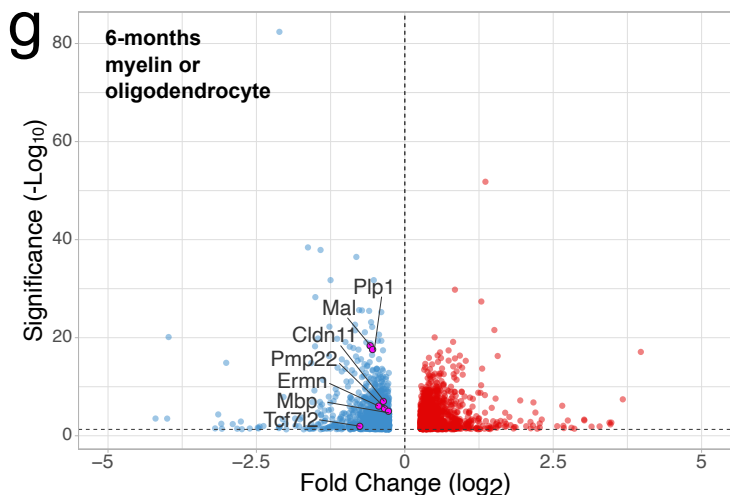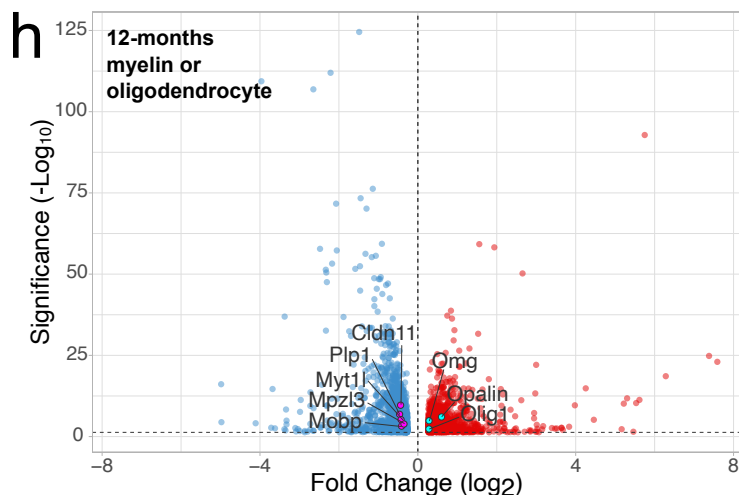

**Supplementary Figure 15. Differentially expressed striatal transcripts related to sphingolipid metabolism, PI/PIP metabolism, glycerolipid metabolism, and myelin or oligodendrocytes in 6-and 12-month-old LacQ140 mice.**

RNA sequencing data in the LacQ140 model (GEO GSE156236) was manually curated to identify differentially expressed transcripts related to **(a,b)** phosphatidylinositol (PI)/ phosphatidylinositol-phosphate (PIP) metabolism, **(c,d)** sphingolipid metabolism, **(e,f)** glycerolipid metabolism, and **(g,h)** myelin or oligodendrocytes. At the 6-month timepoint, 2711 differentially expressed genes (DEG) were detected between LacQ140 (n=5 males, n=5 females) and WT (n=5 males, n=5 females) groups. At the 12-month timepoint, 2989 DEGs were detected between LacQ140 (n=5 males, n=5 females) and WT (n=5 males, n=5 females) groups. Volcano plots were generated from the DEG list (fold change greater than 20% in either direction with an FDR adjusted p-value<0.05 were considered differentially expressed) using VolcanoR software (Goedhart & Luijsterburg, 2020). Red dots indicate genes that were upregulated in LacQ140 compared to WT, whereas blue dots indicate genes that were downregulated in LacQ140 compared to WT. Pink dots with annotations show downregulated genes and cyan dots show upregulated genes related to the indicated biological process. FDR adjusted p-values from the DEG list are  $-\log_{10}$  transformed and fold changes are  $\log_2$  transformed.
